# Visualizing the pH in *Escherichia coli* colonies via the sensor protein mCherryEA allows high-throughput screening of mutant libraries

Fabian Stefan Franz Hartmann<sup>1</sup>, Tamara Weiss<sup>1</sup>, Jing Shen<sup>1</sup>, Dóra Smahajcsik<sup>1</sup> and Gerd Michael Seibold<sup>1</sup>

<sup>1</sup> Department of Biotechnology and Biomedicine, Section for Synthetic Biology, Technical University of Denmark, Kongens Lyngby, Denmark

**Correspondence:** Gerd M. Seibold, Section of Synthetic Biology, Department of Biotechnology and Biomedicine, Technical University of Denmark, Søltofts Plads Building 223, DK-2800, Kongens Lyngby, Denmark; e-mail: [gesei@dtu.dk](mailto:gesei@dtu.dk)

**Running title:** Visualization of internal pH sensor signals in *E. coli* colonies

**Content category:** Synthetic Biology

**Key Words:** mCherryEA, ratiometric biosensors, robotic, high-throughput screening, pH homeostasis, *Escherichia coli*

## 27 **Abstract**

28 Cytoplasmic pH is tightly regulated by diverse active mechanisms and interconnected regulatory  
 29 processes in bacteria. Many processes and regulators underlying pH-homeostasis have been identified *via*  
 30 phenotypic screening of strain libraries towards non-growth at low or high pH values. Direct screens with  
 31 respect to changes of the internal pH in mutant strain collections are limited by laborious methods  
 32 including fluorescent dyes or radioactive probes. Genetically encoded biosensors equip single organisms  
 33 or strain libraries with an internal sensor molecule already during the generation of the strain. In this  
 34 study, we used the pH-sensitive mCherry variant mCherryEA as ratiometric pH biosensor. We visualized  
 35 the internal pH of *E. coli* colonies on agar plates by the use of a Gel-Doc imaging system. Combining this  
 36 imaging technology with robot-assisted colony picking and spotting allowed us to screen and select  
 37 mutants with altered internal pH values from a small transposon mutagenesis derived *E. coli* library.  
 38 Identification of the TN- insertion sites in strains with altered internal pH levels revealed that the  
 39 transposon was inserted into *trkH* (encoding a transmembrane protein of the potassium uptake system)  
 40 or the *rssB* gene (encoding the anti-adaptor protein RssB which mediates the proteolytic degradation of  
 41 the general stress response regulator RpoS), two genes known to be associated with pH-homeostasis and  
 42 pH stress adaptation. This successful screening approach demonstrates that the pH- sensor based analysis  
 43 of arrayed colonies on agar plates is a sensitive approach for the fast identification of genes involved in  
 44 pH-homeostasis or pH stress adaptation in *E. coli*.

45

## 46 **Importance**

47 Phenotypic screening of strain libraries on agar plates has become a versatile tool to understand gene  
 48 functions and to optimize biotechnological platform organisms. Screening is supported by genetically  
 49 encoded biosensors that allow to easily measure intracellular processes. For this purpose, transcription-

50 factor-based biosensors have emerged as the sensor-type of choice. Here, the target stimulus initiates the  
51 activation of a response gene (e.g. a fluorescent protein) followed by transcription, translation and  
52 maturation. Due to this mechanistic principle, biosensor readouts are delayed and cannot report the  
53 actual intracellular state of the cell in real-time. To capture fast intracellular processes adequately,  
54 fluorescent reporter proteins are extensively applied. But these sensor-types are not utilized for  
55 phenotypic screenings so far. To take advantage of their properties, we here established an imaging  
56 method, which allows to apply a fast ratiometric sensor protein for assessing the internal pH of colonies  
57 in a high-throughput manner.

58

59

60

61

62

63

64

65

66

67

68

69

70

71

## 72 1 Introduction

73 Genetically encoded sensors targeting intracellular metabolites have become a versatile tool for  
 74 physiological studies in diverse organisms (Sanford and Palmer, 2017; Koch *et al.*, 2019; Shin *et al.*, 2020).  
 75 These sensors have been successfully applied in bacteria for screening optimized production strains,  
 76 activity of/or resistance against antimicrobial compounds as well as for assessing physiological states and  
 77 metabolic fluxes (Schallmeyer *et al.*, 2014; Maglica *et al.*, 2015; Crauwels *et al.*, 2018; Monteiro *et al.*, 2019;  
 78 Heins *et al.*, 2020). Commonly, two different types of genetically encoded sensors are used: transcription-  
 79 factor-based biosensors (TFBs) or fluorescent-reporter-proteins (FRPs). TFBs are the most extensively  
 80 developed and applied biosensors due to their simplicity to engineer. The basic design generally relies on  
 81 transcription factors, which natively react to effectors (activator or repressor). Upon interaction, the TF-  
 82 effector complex targets or releases a cognate promoter sequence to transduce a response through  
 83 activation or repression of the respective downstream reporter gene such as a fluorescent protein.  
 84 Dynamics of TFBs towards monitoring changes of target product concentrations in real-time are limited  
 85 as the sensor signal depends on transcription, translation, maturation of the fluorescent protein or  
 86 degradation. This, however, provides the advantage that the sensor signal is stable even when exposing  
 87 a sensor strain to varying external conditions, making these type of sensors suited for high-throughput  
 88 screening of strains *via* e.g. fluorescence activated cell sorting (FACS) (Schallmeyer *et al.*, 2014; Eggeling *et*  
 89 *al.*, 2015). In contrast, FRPs respond in real-time to alterations of internal target parameters or  
 90 metabolites such as pH, ATP or NADPH (Goldbeck *et al.*, 2018; Reyes-Fernández and Schuldiner, 2020;  
 91 Botman *et al.*, 2020; Deng *et al.*, 2021). Here, an already produced sensor protein undergoes analyte-  
 92 dependent conformational changes accompanied by a change of the fluorescence properties (Bermejo *et*  
 93 *al.*, 2011b; Martynov *et al.*, 2018). Consequently, FRPs were successfully applied for real-time monitoring  
 94 of internal metabolite levels or oxidation states upon externally applied perturbations (Bermejo *et al.*,  
 95 2011b; Martinez *et al.*, 2012; Goldbeck *et al.*, 2018; Martynov *et al.*, 2018; Depaoli *et al.*, 2019; Hartmann

96 *et al.*, 2020). Measuring internal parameters of individual microbial strains of mutant collections *via* FRPs  
 97 could benefit by the fact that actual values can be measured rather than events which occurred in the  
 98 past. Furthermore, fast sensor dynamics would allow the scientist to perform a sensor calibration and  
 99 validation of sensor properties at the level of the actual screening. However, applying FRPs for FACS-based  
 100 high-throughput screening of microbial strains is challenging due to the varying external conditions. To  
 101 take advantage of the properties of FRPs, the screening method needs to allow maintaining constant  
 102 conditions when conducting the sensor analysis, such as phenotypic screening on agar plates.

103 Many bacterial regulatory mechanisms have been identified *via* phenotypic screening of strain libraries  
 104 with respect to its growth patterns under different conditions. Screening of *E. coli* and other  
 105 microorganisms towards growth vs. non-growth at low or high pH-values revealed many of the processes  
 106 and control mechanisms underlying pH-homeostasis (Reva *et al.*, 2006; Mira *et al.*, 2010; Guerrero-Castro  
 107 *et al.*, 2018; Palud *et al.*, 2018; Bushell *et al.*, 2021). To achieve pH homeostasis, *E. coli* possesses  
 108 regulatory networks for acid and alkaline conditions, which trigger expression of distinct sets of genes  
 109 (Maurer *et al.*, 2005; Hayes *et al.*, 2006). For response to acid conditions, *E. coli* activates systems for  
 110 consumption of intracellular protons *via* deamination and decarboxylation of amino acids, formation of  
 111 neutralizing ammonia from glutamine and extrusion of protons *via* the F<sub>1</sub>Fo-ATPase (Lund *et al.*, 2014;  
 112 Guan and Liu, 2020; Lund *et al.*, 2020). Moreover, potassium uptake and accumulation was shown to be  
 113 essential for the maintenance of internal pH in *E. coli*. Under acidic conditions a neutral pH in the  
 114 cytoplasm can only be maintained if sufficient potassium is available, accumulated *via* one of three  
 115 potassium uptake systems (Roe *et al.*, 2000; Reyes-Fernández and Schuldiner, 2020). Upon exposure to  
 116 alkaline pH, *E. coli* expresses genes for cation proton antiporters, which import protons in exchange for  
 117 sodium and/or potassium ions (Krulwich *et al.*, 2011; Ito *et al.*, 2017). Following the identification of a  
 118 mutant strain possessing a pH-dependent growth phenotype, the cytoplasmic pH of the isolated mutant  
 119 is measured *via* fluorescent dyes (e.g. BCECF and SNARF), radioactive probes (Kashket, 1985; Han and

Burgess, 2010) or genetically encoded sensor proteins (Martynov *et al.*, 2018; Rajendran *et al.*, 2018). For this purpose, different ratiometric pH responsive RFPs such as pHluorin and pHred have been developed, both possessing a  $pK_a$  of 6.9 but different intrinsic fluorescence properties (Miesenböck *et al.*, 1998; Tantama *et al.*, 2011; Martynov *et al.*, 2018). Recently, the mCherry variant mCherryEA was shown to be an effective ratiometric red fluorescent protein pH biosensor possessing a  $pK_a$  of 7.3 (Rajendran *et al.*, 2018). This is close to the range of internal pH values reported for *E. coli* (7.4-7.9) (Slonczewski *et al.*, 2009), making this sensor protein well suited for applications in *E. coli*.

In this study, we successfully visualized ratiometric sensor signals from the genetically encoded pH sensor mCherryEA in *E. coli* colonies cultivated on agar plates by using an imaging system equipped with filters for fluorescence detection. Combining this imaging technology with robot-assisted colony picking and spotting allowed us to screen and select mutants with altered internal pH levels from a small transposon mutagenesis derived *E. coli* library. We here show that a sensor analysis with the pH sensor mCherryEA of colonies on agar plates is a sensitive approach for the fast identification and characterization of genes involved in pH-homeostasis or pH stress adaption in *E. coli*. The here established approach can easily be adapted for other strain backgrounds or genetically encoded FRPs targeting another product or internal parameter and thus enables novel studies in microbial systems biology.

136  
137  
138  
139  
140  
141

## 142 2 Materials and methods

### 143 Strains, media, and culture conditions

144 Bacterial strains and plasmids used in this study are listed in Table 1. Cloning as well as biosensor  
 145 expression for the preparation of crude cell extracts was carried out using *E. coli* DH5  $\alpha$ , cultivated in  
 146 Lysogeny Broth (LB) medium (Bertani, 2004). *E. coli* MG 1655 and *E. coli* TK 2309 were pre-cultured in LK  
 147 medium (5 g/L yeast extract; 10 g/L BactoTryptone; 6.4 g/L KCl). For main cultures as well as short time  
 148 cultivations to assess impact of potassium on pH,  $K_{0.1}$ ,  $K_{30}$  and  $K_{120}$  media was prepared (Epstein and Kim,  
 149 1971). For this purpose  $K_0$  buffer (8.25 g/L  $Na_2HPO_4 \cdot 2H_2O$ , 2.8 g/L  $NaH_2PO_4 \cdot H_2O$ , 1 g/L  $(NH_4)_2SO_4$ ) was  
 150 prepared and a final buffer concentration of 0.1 mM KCl or 60 mM KCl was adjusted in order to get  $K_{0.1}$   
 151 and  $K_{30}$  media, respectively.  $K_{120}$  media was prepared by using  $K_{120}$  buffer instead (8 g/L  $K_2HPO_4$ ; 3.1 g/L  
 152  $KH_2PO_4$ ; 1 g/L  $(NH_4)_2SO_4$ ). All media and buffers were prepared using ultrapure water prepared by using  
 153 an arium®pro ultrapure water purification system (Sartorius, Germany). Prior inoculation, all  $K_x$  media  
 154 were supplemented with 0.2 % glucose, 0.4 mM  $MgSO_4 \cdot 7H_2O$ , 0.6  $\mu M$   $(NH_4)_2SO_4$  x  $FeSO_4 \cdot 6H_2O$  and  
 155 thiamin- HCl 0.0001% (w/v). For screening purposes, Screening Broth (SB) medium (5 g/L yeast extract;  
 156 10 g/L BactoTryptone; 100 mM NaCl; 50 mM KCl, buffered with 50 mM TRIS) was used (pH 7.0). For  
 157 preparation of agar plates 16 g/L agar was added to the respective media. Strains carrying plasmids and  
 158 transposons were cultivated in presence of kanamycin (50  $\mu g/mL$ ) or chloramphenicol (20  $\mu g/mL$ ). If  
 159 required, 1 mM IPTG was added to induce expression of the gene for the biosensor. For fluorescence  
 160 imaging of agarose plates, 50 mL of the medium were used for each plate (SBS-format PlusPlates, Singer  
 161 Instruments, United Kingdom) and supplemented with black food dye (30  $\mu L/plate$ ) to reduce the  
 162 fluorescence background from the media.

163 Table 1: Bacterial strains and plasmids used in this study.

| Bacterial strains/<br>Plasmids                          | Description                                                                                                                                                     | Reference/Resource              |
|---------------------------------------------------------|-----------------------------------------------------------------------------------------------------------------------------------------------------------------|---------------------------------|
| <b><i>Escherichia coli</i></b>                          |                                                                                                                                                                 |                                 |
| <i>E. coli</i> DH5 $\alpha$                             | F- $\phi$ 80dlacZ $\Delta$ (lacZYA-argF) U169 deoRsupE44 $\Delta$ lacU169 (f80lacZDM15) hsdR17 recA1 endA1 (rk- mk+) supE44gyrA96 thi-1 gyrA69 relA1            | (Studier and Moffatt, 1986)     |
| <i>E. coli</i> DH5 $\alpha$ (pEKEx2)                    | <i>E. coli</i> DH5 $\alpha$ carrying the shuttle vector pEKEx2                                                                                                  | This study                      |
| <i>E. coli</i> DH5 $\alpha$ (pEKEx2_ <i>mCherryEA</i> ) | <i>E. coli</i> DH5 $\alpha$ carrying a derivative of the shuttle vector pEKEx2 for IPTG inducible expression of the <i>mCherryEA</i> gene                       | This study                      |
| <i>E. coli</i> Top10                                    | F- mcrA $\Delta$ (mrr-hsdRMS-mcrBC) $\phi$ 80lacZ $\Delta$ M15 $\Delta$ lacX74 recA1 araD139 $\Delta$ (ara-leu)7697 galU galK $\lambda$ - rpsL(StrR) endA1 nupG | Invitrogen                      |
| <i>E. coli</i> MG 1655                                  | F' lamda- ilvG-rfb-50rpH-1                                                                                                                                      | (Blattner <i>et al.</i> , 1997) |
| <i>E. coli</i> MG 1655 (pXMJ19)                         | <i>E. coli</i> MG 1655 carrying the vector pXMJ19                                                                                                               | This study                      |
| <i>E. coli</i> MG 1655 (pXMJ19_ <i>mCherryEA</i> )      | <i>E. coli</i> MG 1655 carrying a derivative of pXMJ19 for IPTG-inducible <i>mCherryEA</i> expression                                                           | This study                      |
| <i>E. coli</i> TK 2309                                  | F' thi rha lacZ nagA trkD1 trkA405 kdp::Tn10                                                                                                                    | (Epstein, 1986)                 |
| <i>E. coli</i> TK 2309 (pXMJ19_ <i>mCherryEA</i> )      | <i>E. coli</i> TK 2309 carrying a derivative of pXMJ19 for IPTG-inducible <i>mCherryEA</i> expression                                                           | This study                      |
| <b>Plasmids</b>                                         |                                                                                                                                                                 |                                 |
| pEKEx2                                                  | Expression vector; <i>ptac lacI<sup>q</sup></i> Km <sup>r</sup>                                                                                                 | (Eikmanns <i>et al.</i> , 1991) |
| pXMJ19                                                  | Expression vector; <i>ptac lacI<sup>q</sup></i> Cam <sup>r</sup>                                                                                                | (Jakoby <i>et al.</i> , 1999)   |
| pEKEx2_ <i>mCherryEA</i>                                | pEKEx2 derivative for IPTG-inducible <i>mCherryEA</i> gene expression                                                                                           | This study                      |
| pXMJ19_ <i>mCherryEA</i>                                | pXMJ19 derivative for IPTG-inducible <i>mCherryEA</i> gene expression                                                                                           | This study                      |

164

165

166



## 167 **Genetics**

168 Gene fragment synthesis was carried out by Integrated DNA Technologies (IDT) (Denmark). The sequence  
169 is provided in Table S1. For amplification of the gene fragments primer sets were designed using  
170 NEBuilder. All primers are listed in Table S1. Expression plasmids were assembled using the Gibson  
171 assembly kit (New England Biolabs, U.S.A) according to the manufacturer's instructions. After  
172 transformation, recombinant strains were selected using LB-agar plates supplemented with appropriate  
173 antibiotics. Recombinant *E. coli* MG1655 and TK 2309 strains were selected on LK-media agar plates with  
174 appropriate antibiotics. The plasmids were analyzed *via* PCR, restriction digests, and DNA sequencing  
175 (Eurofins Genomics, Germany).

176

## 177 **Transposon mutagenesis library generation and introduction of pXMJ19-mCherryEA into the library**

178 The EZ-Tn5 <KAN-2> Tnp transposome (Epicentre Biotechnologies, U.S.A) was introduced into  
179 *E. coli* Top10 by electroporation. Cells were subsequently spread plated on LB agar plates containing  
180 50 µg/mL kanamycin and incubated overnight at 37 °C. Single colonies from the spread plates were  
181 analyzed to determine the diversity of insertion sites *via* linker PCR as described below. Pools of  $5-6 \times 10^3$   
182 colonies were collected and frozen at -80 °C in 0.9 % NaCl containing 30 % glycerol. For the introduction  
183 of the sensor plasmid, 100 µL of these glycerol stocks were used to inoculate 2 mL LB containing 50 µg/mL  
184 kanamycin and cultivated overnight on a shaker at 180 rpm and 37 °C. Then, 2 mL of the pre-culture were  
185 used to inoculate 50 mL LB containing 50 µg/mL kanamycin in a 500 mL flask, cultivated at 200 rpm, 37 °C,  
186 until the culture reached an OD<sub>600</sub> of 0.4, and then competent cells were performed as described in  
187 (Sambrook *et al.*, 1989). The plasmid pXMJ19\_mCherryEA was transformed into the mutant library  
188 competent cells using electroporation. Transformants were spread plated on LB plates containing  
189 50 µg/mL kanamycin and 20 µg/mL chloramphenicol and used for further screening.

## 190 Identification of Tn5 insertion sites using Linker PCR

191 Genomic DNA was extracted from 1.5 mL cultures by using the GenElute™ Bacterial Genomic DNA Kit  
 192 (Merck, Germany). Linker PCR was used to test individual transformant colonies and to determine the  
 193 diversity of insertion sites. Genomic DNA (2 µg) was digested with the *AluI* restriction enzyme (New  
 194 England Biolabs, U.S.A) and purified by using an illustra GFX PCR DNA and Gel Band Purification Kit (GE  
 195 Healthcare, U.S.A). The linker was generated by annealing 100 µM of each oligonucleotides P2-FW  
 196 (Table S1) and P3-RV (Table S1) in an annealing buffer (10 mM Tris, 50 mM NaCl, 1 mM EDTA, pH 8.0) after  
 197 incubation at 95 °C for 2 minutes followed by cooling to 25 °C for 1 hour and chilling to 4 °C. Then the  
 198 linker was ligated to the ends of restriction fragments (50 ng) by using T4 DNA ligase (New England Biolabs,  
 199 U.S.A). The ligated DNA templates were cleaned by an illustra GFX PCR DNA and Gel Band Purification Kit  
 200 (GE Healthcare, U.S.A). Finally, Linker PCR was carried out with the ligated DNA template and transposon-  
 201 specific oligonucleotides P4-FW (Table S1) and P5-RV (Table S1) by using Phusion X7 and thermocycling  
 202 conditions of 98 °C for 30 seconds, followed by 35 cycles of 98 °C for 10 sec, 55 °C for 30 seconds and 72 °C  
 203 for 1 min, with a final extension step of 72 °C for 10 minutes. The resulting PCR samples were run on 2%  
 204 agarose gels at 100 V for 25 min.

205

## 206 Fluorescence analysis

207 Fluorescence measurements of liquid cultures were conducted in black flat-bottomed 96-well microplates  
 208 (Thermo Fisher Scientific, Germany) using a SpectraMax iD3 multi-mode plate reader (Molecular Devices  
 209 LLC, U.S.A). Excitation scans were recorded by setting the excitation wavelength between 410 nm and  
 210 588 nm and the emission wavelength at 630 nm. For ratiometric analysis of the biosensor signal, the  
 211 emission maxima obtained upon an excitation at 454 nm and 580 nm were taken and the corresponding  
 212 biosensor ratio was calculated by dividing the former emission intensity by the latter. Fluorescence  
 213 imaging was carried out using the photo-documentation system Fusion FX (Vilber Lourmat, France). The

Fusion FX was equipped with capsules for excitation at 440 nm and 530 nm with a set exposure time of 40 msec and 1560 msec, respectively. Fluorescence was measured using a 595 nm emission filter. Images were analyzed using the Fusion FX software Evolution-edge provided by Vilber Lourmat.

# ***In vitro* and *in situ* characterization of biosensor protein**

For *in vitro* characterization, biosensor strains and empty vector controls were cultivated in shaking flasks (50 mL, LB medium with respective antibiotics) until an OD<sub>600</sub> of 1 was reached. Subsequently, 1 mM IPTG was added in order to induce expression of the gene from the biosensor and cultivation was continued for 16 hours at 37 °C and 180 rpm. For preparation of crude cell extracts, cells were harvested by centrifugation (4000 rpm, 10 min., 4 °C), washed twice in 1 M potassium phosphate buffer with different pH values set by titrating 1 M K<sub>2</sub>HPO<sub>4</sub> with 1 M KH<sub>2</sub>PO<sub>4</sub> and finally the washed cells were resuspended in 1 mL of the 1 M potassium phosphate buffer with the respective pH. Disruption of the cells was conducted using a Ribolyzer (Precellys TM Control Device, Bertin Technologies, France) at 6000 rpm, four times for 30 seconds each. Cell debris were removed *via* centrifugation (13.000 g, 20 min.; 4 °C) and 200 µL of the supernatant was transferred to black flat-bottomed 96-well microplates (Thermo Fisher Scientific, Germany) for further fluorescence analysis a SpectraMax iD3 microplate reader was used as stated above.

For *in situ* characterization of the pH biosensor mCherryEA, cells pre-cultivated as described for the *in vitro* characterization were washed with 1 M potassium phosphate buffer (PBS) with different set pH-values and finally resuspended in a PBS with respective pH to an OD<sub>600</sub> of three. Aliquots of the cell suspensions (190 µL) were then transferred to black flat-bottomed 96-well microplates. Subsequently 10 µL CTAB (0.05 % (w/v)) were added to the wells and the plate was incubated for 5 min. at room temperature in the dark for permeabilization of the cell membrane as previously described (Crauwels *et*

236 *al.*, 2018; Goldbeck *et al.*, 2018). Subsequently, fluorescence measurements for biosensor analysis were  
237 performed in a microplate reader as described above.

238

239 ***In vivo* assay to assess pH homeostasis by the use of the plasmid encoded sensor protein mCherryEA in**  
240 ***E. coli* liquid cultures**

241 Single colonies of *E. coli* strains carrying the plasmid pXMJ19\_ *mCherryEA* were used to inoculate 5 mL LK  
242 medium, incubated ON/16 hours and then used to inoculate 50 mL LK medium supplemented with  
243 1 mM IPTG to induce expression of the gene for the pH-biosensor protein mCherryEA. Stationary cells  
244 were harvested *via* centrifugation (3500 rpm, 5 min., 4 °C) and washed twice in 0.9 % NaCl. Finally, cells  
245 were re-suspended in K<sub>30</sub> and the suspension then used to inoculate 50 mL K<sub>30</sub> medium supplemented  
246 with 1 mM IPTG. The next day, cells were harvested *via* centrifugation (3500 rpm; 5 min., 4°C) and washed  
247 three times with 0.9 % NaCl. Subsequently, cells were grown for 3 hours either in 50 mL K<sub>0.1</sub> or K<sub>120</sub>-  
248 medium supplemented with 1 mM IPTG. Finally, an OD<sub>600</sub> of 3 was adjusted by re-suspending the cells in  
249 fresh K<sub>0.1</sub> or K<sub>120</sub> medium (0.2 % glucose (w/v)) with different pH values. Then, 180 µL of each cell  
250 suspension was transferred to black 96-well plates. Incubation and fluorescence measurements were  
251 carried out using the SpectraMax iD3 plate reader (incubation temperature 37 °C, continuous orbital  
252 shaking at medium intensity). Biosensor signals were then recorded in intervals of five minutes for one  
253 hour. At the end of the experiment, CTAB (final concentration 0.05 % (v/v)) was added manually to each  
254 well in order to verify the biosensor functionality *via* equilibration of external and internal conditions.  
255 Moreover, this signal was used for re-calibration of the pH biosensor signals at the end of every  
256 experiment.

257

258

## 259 **Robotic colony picking and spotting**

260 Prior colony picking, wells of 96-well microtiter plates (Greiner bio-one B.V., Netherlands) were filled with  
 261 150  $\mu$ L liquid SB medium. Cells from single colonies on transformation plates were picked up using the  
 262 colony picking robot (QPix 420, Molecular Devices, LLC, U.S.A.) mounted with a bacterial 96-pin picking  
 263 head and transferred to the designated well in the 96-well plate. The QPix robot was programmed to  
 264 create a copy of the target 96-well plate in a second prefilled 96-well plate in order to finally get one  
 265 working plate and one back-up plate for long-term storage purposes. Following the picking procedure, the  
 266 plates were incubated for 16 hours in plate holders at 37°C and 280 rpm. Subsequently, 150  $\mu$ L glycerol  
 267 (50 % (v/v)) were added to the cultures of the back-up plate, which was then immediately stored at -80°C.  
 268 The working plate was used as a source plate for robotic spotting using a ROTOR HDA benchtop robot  
 269 (Singer Instruments, United Kingdom) on rectangular OmnyTray plates (Singer Instruments) with solidified  
 270 SB medium as the target plate. Four liquid source plates were finally combined on one target solid plate  
 271 in a 96 well to 384 spots mode. The OmnyTray plates were prepared by using 50 mL of the respective  
 272 media supplemented with 1 mM IPTG for biosensor expression. Prior liquid to solid spotting, pins were  
 273 rotated five times in the source 96-well plate in order to generate a homogenous mixture of the cell  
 274 suspension. Spotting was conducted by setting an overshoot of 1.5 mm and a pin-pressure of 7 % using  
 275 long 96-well pins (Singer Instruments). To avoid reflection from the plastic edges of the OmnyTray plates  
 276 as well as effects resulting from the outer barrier of arrayed colonies, the outermost lines and rows of  
 277 spotted colonies on each plate were excluded from further analysis resulting in 16 x 8 colonies on each  
 278 target agar plate.

## 279 **Data analysis**

280 Analysis of one-way variance (ANOVA) with Tukey's test was used to assess differences of sensor signals  
 281 derived from *E. coli* strains harboring the genetically encoded biosensor mCherryEA. Differences were  
 282 considered statistically significant when  $p < 0.05$ .

## 283 3 Results and Discussion

### 284 3.1 The plasmid encoded sensor protein mCherryEA allows real-time monitoring of internal pH in *E. coli*

285 The mCherry variant with the I158E and Q160A amino acid exchanges, originally engineered to support  
 286 excited-state proton transfer for generating a long Stokes shift variant, exhibits at neutral pH two  
 287 excitation peaks corresponding to the protonated and deprotonated chromophore with a single emission  
 288 peak (Piatkevich *et al.*, 2010). Based on this property, the mCherry variant named mCherryEA, was found  
 289 to function as a ratiometric pH sensor protein, because the protonation state of Glu158 is sensitive to the  
 290 pH of the surrounding solution, which results in pH-dependent protonation of the chromophore  
 291 (Rajendran *et al.*, 2018). To generate a sensor plasmid encoding the mCherryEA, the gene was synthesized  
 292 and cloned into the backbone of the expression plasmid pEKEx2, resulting in the plasmid  
 293 pEKEx2\_mCherryEA. Analysis of the fluorescence properties of the pH biosensor protein mCherryEA in cell  
 294 free extracts of *E. coli* DH5 $\alpha$  (pEKEx2\_mCherryEA) at different pH-values has shown the expected  
 295 ratiometric and pH-dependent change of the emission intensity at 630 nm (Fig. 1a), as previously  
 296 described (Rajendran *et al.*, 2018). In detail, an increase of the pH was accompanied by an increased  
 297 emission intensity obtained for an excitation at 454 nm (maximum), whereas the emission intensity upon  
 298 excitation at 580 nm decreased (Fig. 1a). Consistently, no pH-dependent changes of fluorescence were  
 299 detected in cell-free extracts of the empty vector control strain *E. coli* (pEKEx2) (Fig. S1). Based on the  
 300 changes of fluorescence emissions for an excitation of both 454 nm as well as 580 nm, the pH dependent  
 301 ratiometric response of the biosensor mCherryEA was calculated (Fig. 1b). As depicted in Fig. 1b, an  
 302 approximately eight-fold increase of the ratio occurred with increasing pH values from 6.5 to 9.0. Taking  
 303 into consideration that internal pH values between 7.4-7.9 have been reported for *E. coli* (Roe *et al.*, 2000;  
 304 Slonczewski *et al.*, 2009; Krulwich *et al.*, 2011), the mCherryEA biosensor properties seem well suited to  
 305 assess changes towards both more alkaline as well as acidic internal pH values. For also testing the *in vivo*  
 306 functionality of the mCherryEA biosensor, *E. coli* DH5 $\alpha$  (pEKEx2\_mCherryEA) cells were suspended in PBS

307 buffer with different pH values and subsequently the ratios of the fluorescence signals for the biosensor  
308 mCherryEA determined for each of the cell suspensions in the microplate reader. As depicted in Fig 1c,  
309 increased ratios were determined for *E. coli* DH5 $\alpha$  (pEKEx2\_mCherryEA) suspensions in high pH PBS buffer  
310 and low ratios for suspensions in low pH-values. The ratiometric biosensor curve obtained from  
311 mCherryEA in cell-free extracts (Fig. 1b) differed from these determined for suspensions of intact cells  
312 (Fig. 1c). This observation indicates that pH-homeostasis might proceed in the intact cells, causing the  
313 internal pH to be different from the external. The addition of the quaternary ammonium surfactant  
314 cetyltrimethylammonium bromide (CTAB) to cells permeabilizes the cell membrane and disrupts the  
315 proton gradient across the cytoplasmic membrane allowing the internal pH to become identical to the  
316 external (Cella *et al.*, 1952; Crauwels *et al.*, 2018). Indeed, the addition of CTAB to the suspensions of  
317 *E. coli* DH5 $\alpha$  (pEKEx2\_mCherryEA) with different pH-values resulted in a shift of the ratiometric  
318 mCherryEA biosensor signals (Fig. 1c). When the pH<sub>in</sub> values for the CTAB treated cell suspensions were  
319 calculated based on the obtained ratios (Fig. 1d), pH<sub>in</sub> values within the expected dynamic range of the  
320 biosensor were obtained (Fig. 1d). The pH<sub>in</sub> for non-permeabilized cell suspensions of *E. coli* DH5 $\alpha$   
321 (pEKEx2\_mCherryEA), however, was different from the external pH (Fig. 1d), indicating that the cells  
322 probably performed to some extent pH-homeostasis even in absence of an energy source.

323

324

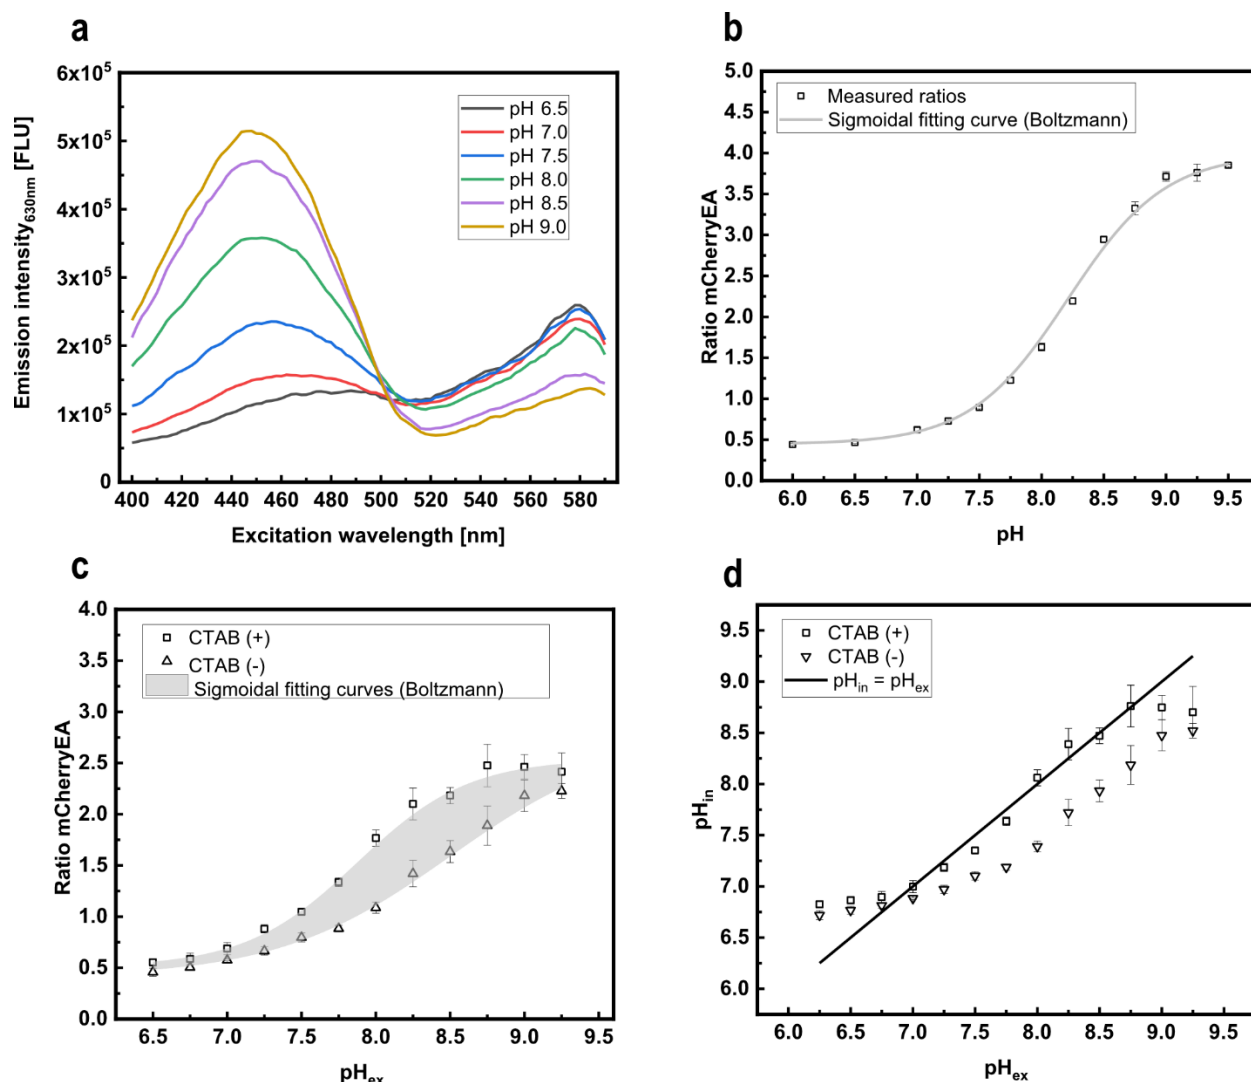

Figure 1: *In vitro* characterization of the pH biosensor mCherryEA using crude cell extracts of *E. coli* DH5 $\alpha$  (pEKEx2\_mCherryEA). The spectral biosensor response upon changes of the respective pH (a) and the corresponding calculated pH dependent ratios (b). mCherryEA biosensor ratio in *E. coli* DH5 $\alpha$  (pEKEx2\_mCherryEA) with and without the addition of CTAB (0.05% (w/v)) (c) and the calculated internal pH values of permeabilized cells compared to non- permeabilized cells (d). The biosensor protein was produced in *E. coli* DH5 $\alpha$  (pEKEx2\_mCherryEA). Cell extracts were prepared in 1 M PBS buffer with different pH values. For *in-situ* characterization, *E. coli* DH5 $\alpha$  (pEKEx2\_mCherryEA) was re-suspended in 1 M PBS buffer with different pH values and subsequently the cell suspension transferred to black 96- well plates. Fluorescence was measured before adding cetyltrimethylammonium bromide (CTAB) and after the addition of CTAB (incubation for 5 minutes in the dark prior repeating the fluorescence measurements). Ratio of the biosensor mCherryEA was calculated by dividing the emission intensity (630 nm) obtained with an excitation at 454 nm by an excitation of 580 nm. Error bars represent standard deviation calculated from at least three replicates. Curve fitting was conducted using a sigmoidal fit (Boltzmann) in Origin. Fluorescence measurements were conducted in a SpectraMax iD3 plate reader.



340 In order to test the pH biosensor mCherryEA for *in vivo* monitoring of internal pH values, we transformed  
 341 *E. coli* MG 1655 as well as the triple mutant strain *E. coli* TK 2309, which lacks all three major potassium  
 342 uptake systems (Trk-, Kdp-, Kup-) with the sensor plasmid pXMJ19\_mCherryEA resulting in sensor  
 343 equipped strains *E. coli* MG 1655 (pXMJ19\_mCherryEA) (WT\_S) and *E. coli* TK 2309 (pXMJ19\_mCherryEA)  
 344 (TK 2309\_S). For *E. coli* TK 2309 a growth deficit was reported in presence of less than 5 mM of potassium  
 345 in the growth media (Roe *et al.*, 2000). To verify this phenotype for the sensor carrying strain TK 2309\_S,  
 346 a growth experiment with WT\_S as well as TK 2309\_S was conducted in K<sub>0.1</sub> and K<sub>120</sub> minimal medium (Fig.  
 347 2a, b). Growth of the WT\_S strain proceeded with a rate of 0.12 h<sup>-1</sup> and 0.2 h<sup>-1</sup> at 0.1 mM and 120 mM  
 348 potassium, respectively. (Fig. 2a). At low potassium concentrations a growth deficit for TK 2309 was  
 349 observed (Fig. 2b) (Roe *et al.*, 2000). However, this phenotype was abolished in presence of 120 mM  
 350 potassium resulting in a growth rate of 0.22 h<sup>-1</sup> (Fig. 2b).

351 For *E. coli* TK 2309 a strong shift of pH<sub>in</sub> towards an acidic value of 6.3 has been described upon incubation  
 352 at an external pH of 6 and low potassium concentrations (Roe *et al.*, 2000). This strong acidification of pH<sub>in</sub>  
 353 in *E. coli* TK 2309 does not occur in presence of 120 mM potassium and in *E. coli* strains with at least one  
 354 functional potassium uptake system (Roe *et al.*, 2000). To re-investigate the effects of potassium on pH<sub>in</sub>  
 355 by using the biosensor mCherryEA, we adapted a recently described real-time pH-homeostasis  
 356 experiment (Reyes-Fernández and Schuldiner, 2020). For this purpose, WT\_S and TK 2309\_S were pre-  
 357 cultivated 24 hours in LK media followed by an cultivation step in K<sub>30</sub> medium until the stationary phase  
 358 was reached. Following that, the two strains were harvested, washed three times with 0.9 % NaCl and  
 359 cultivated in K<sub>0.1</sub> and K<sub>120</sub> minimal medium for three hours. Finally, the cells were suspended in fresh K<sub>0.1</sub>  
 360 and K<sub>120</sub> medium (pH of 6.0) containing 0.2 % (w/v) glucose and then immediately transferred as 180 µl  
 361 aliquots into 96-well-plates. Cells were incubated at 37°C and fluorescence signals were recorded *in-line*  
 362 for 60 minutes for determination of internal pH levels. As depicted in Fig. 2c, in presence of 0.1 mM  
 363 potassium, the internal pH of WT\_S increased from initially 6.5 to approximately 7.0 within 15 minutes of

364 incubation. Upon addition of CTAB just before the experiment was ended the sensor signal for  $pH_{in}$   
365 dropped from 7.0 to approximately 6.5, which corresponds to the lower detection limit of the pH  
366 biosensor mCherryEA. A similar time course for  $pH_{in}$  was observed for WT\_S in presence of 120 mM  
367 potassium, for which the internal pH increased to approximately 7.7 after 15 minutes of incubation (Fig.  
368 2c), before addition of CTAB caused the expected drop of the biosensor signal for  $pH_{in}$ . The  $pH_{in}$  value of  
369 7.7 measured for WT\_S corresponds well to the  $pH_{in}$  values between 7.4 and 7.9 previously reported for  
370 *E. coli* WT strains when incubated under similar conditions (Roe *et al.*, 2000; Slonczewski *et al.*, 2009;  
371 Reyes-Fernández and Schuldiner, 2020). Investigation of  $pH_{in}$  via the sensor mCherryEA in the potassium  
372 uptake deficient strain TK2309\_S revealed that the sensor signal remained constantly at the lower  
373 detection limit of 6.5 for incubation in  $K_{0.1}$  medium with pH 6.0 (Fig. 2d). As expected for this external pH,  
374 addition of CTAB at the end of the experiment did not have any impact on the sensor signal for  $pH_{in}$ . In  
375 presence of 120 mM potassium, the initially recorded internal pH of 6.5 for TK2309\_S increased within  
376 the first 20 minutes to around  $7.3 \pm 0.1$  and remained stable at this level prior CTAB addition at the end  
377 of the experiment, which caused the expected drop of the sensor signal (Fig. 2d). The here detected  $pH_{in}$   
378 values for TK2309\_S below 6.5 in  $K_{0.1}$  medium and 7.3 for  $K_{120}$  medium correspond well with the internal  
379 pH values of 6.3 and 7.4 previously determined for this strain by the use of  $[7-^{14}C]$ -benzoic acid (Roe *et al.*,  
380 2000).

381 Taken together, these experiments illustrate well the functionality of the sensor mCherryEA for the  
382 analysis of  $pH_{in}$  in liquid cultures of *E. coli* but also revealed restrictions of this method, which are set by  
383 the lower and upper pH detection limits of 6.5 and 8.75 of the used sensor protein.

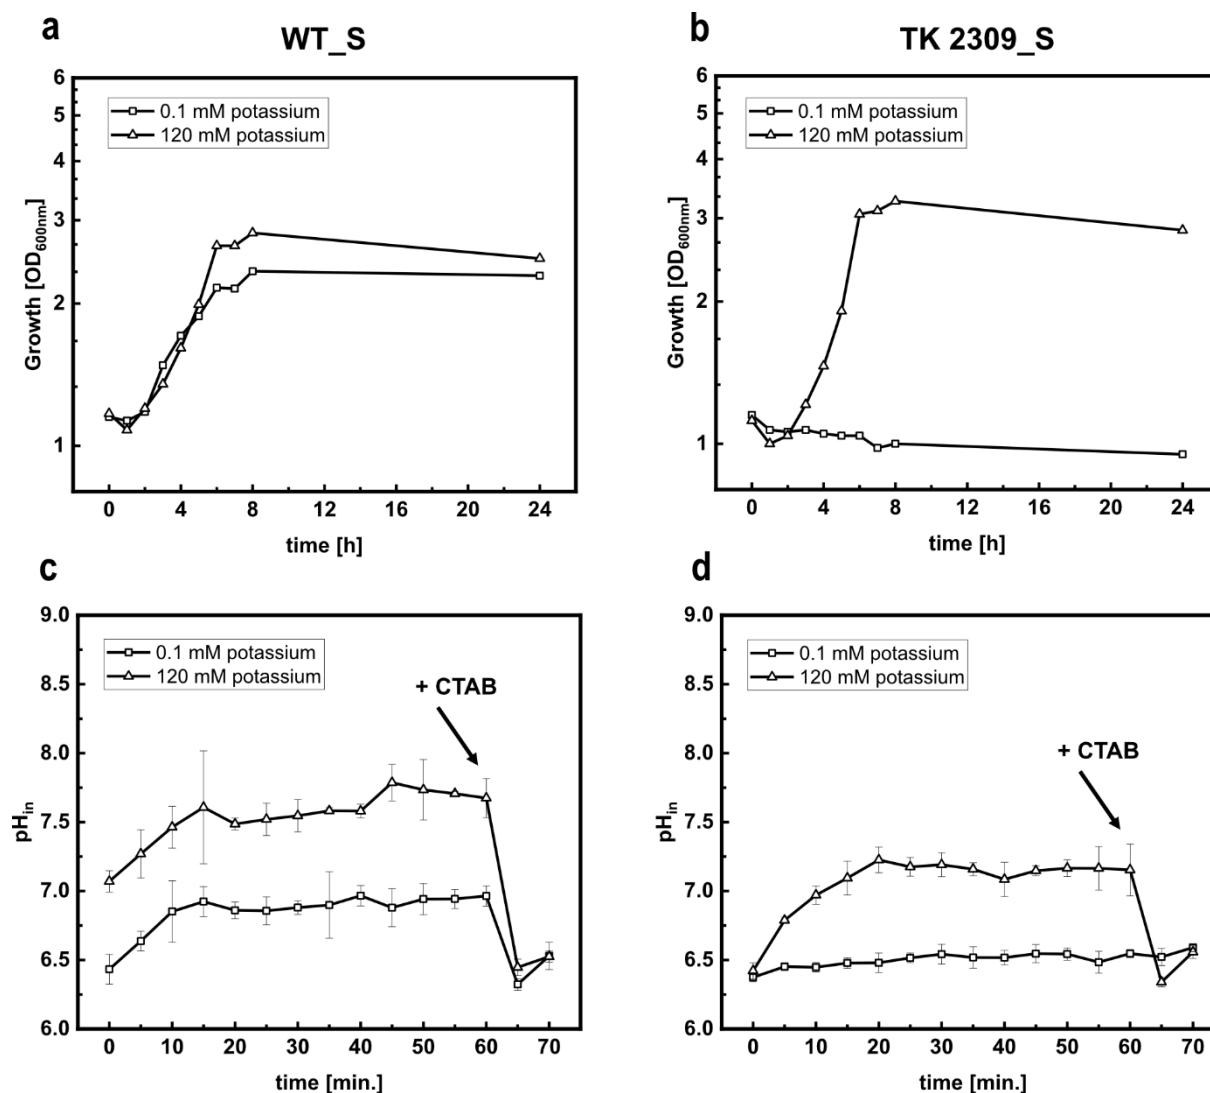

Figure 2: Growth (a, b) and *in-line* monitoring of the internal pH (c, d) using the biosensor mCherryEA in minimal medium supplemented with 0.1 mM potassium ( $K_{0.1}$ ) and 120 mM potassium ( $K_{120}$ ) for *E. coli* MG 1655 (pXMJ19\_mCherryEA) (WT\_S) (a, c) and *E. coli* TK 2309 (pXMJ19\_mCherryEA) (TK 2309\_S) (b, d). Growth experiment was conducted in 50 mL cultures (500 mL shaking flasks; 37°C, 150 rpm) using  $K_{0.1}$  and  $K_{120}$  minimal medium and 1 % glucose (w/v). Growth was monitored *via* the optical density at 600 nm. For *in-line* monitoring, biosensor strains were prepared as stated in the methods and materials part. Emission intensity at 630 nm was recorded upon an excitation at 454 nm and 580 nm. At the end of the experiment, cetyltrimethylammonium bromide (CTAB; final concentration 0.05% (w/v)) was added for sensor calibration purposes as it allows an equilibration of the internal and external environment.

### 3.2 The biosensor protein mCherryEA can report the internal pH of *E. coli* colonies on agar plates

To test if the sensor can be used to directly assess internal pH levels in colonies on agar plates, colonies of *E. coli* MG 1655 (pXMJ19\_mCherryEA) (WT\_S) were spotted on rectangle plates containing SB agar supplemented with 1 mM IPTG. After the robot assisted spotting, the agar plates were incubated for 20 hours at 37 °C and the fluorescence of the colonies then detected *via* imaging using an Imaging system equipped for fluorescence analysis. The fluorescence detection was conducted using two different capsules for excitation (440 nm and 530 nm) and one filter (595 nm) to measure fluorescence emission. For colonies of WT\_S, a mean fluorescence intensity of  $2.22 \times 10^4 \pm 552$  FLU was measured for excitation at 440 nm and a higher fluorescence intensity of  $3.04 \times 10^4 \pm 717$  FLU when excited at 530 nm (Fig. 3a). For the empty vector control strain *E. coli* (pXMJ19), colony fluorescence was more than four ( $0.48 \times 10^4 \pm 90$  FLU) and six ( $0.44 \times 10^4 \pm 63$  FLU) times lower upon excitation at 440 nm and 530 nm, respectively (Fig. 2S). These results show the proper expression of the biosensor protein mCherryEA in the WT\_S colonies on SB agar plates supplemented with IPTG.

Genetically encoded FRPs have been shown to respond instantaneously to changes of the target internal parameter in liquid cultures as shown in this study for the FRP mCherryEA in *E. coli*. This property should allow to directly verify the biosensor functionality in colonies grown on agar plates. For this purpose, PBS buffer solutions with different set pH values containing 0.05 % CTAB were applied directly as 5 µl drops onto each of the colonies and then imaged again in the fluorescence imaging system. The changed fluorescence emission intensities after exposure of the colonies to the different buffer solutions revealed, that the biosensor mCherryEA in the now treated colonies responded in a ratiometric manner to the different pH values (Fig. 3b). In detail, the emission intensity at 595 nm for excitation at 440 nm increased when adding PBS buffer with higher pH values and the emission intensity for the excitation at 530 nm decreased at lower pH values (when compared to the initial intensities). By multiplexing the two fluorescence images derived for the treated colonies at different pH values, where excitation at 440 nm

was assigned to the false color blue and excitation at 530 nm to the false color red, the effects of the exposure to low and high pH values could be visualized as a shift from red to blue colored colonies, respectively (Fig. 3b). The values for the fluorescence intensities obtained upon excitation at 440 nm and 530 nm determined for the colonies on the agar plate were used to calculate ratios for colonies before exposing them to the different set pH buffer solutions supplemented with CTAB and after their respective treatment. The ratio of the biosensor signal was shown to be in a narrow range (between 0.7 and 0.8) for all colonies before exposing them to the buffer solutions (Fig. 3c). Treatment of the colonies with the different pH-buffer solutions containing CTAB resulted in a two-fold ratio increase from 0.5-0.6 to 1.1-1.2 when adding buffer solutions with pH values of pH 6.5 or 8.75, respectively (Fig. 3c). Based on the biosensor ratios for untreated colonies, an internal pH of  $7.53 \pm 0.08$  was determined for *E. coli* MG 1655 (pXMJ19\_mCherryEA) (WT\_S) (Fig. 3d). This is in accordance with an internal pH value of  $7.43 \pm 0.01$  determined for liquid cultures of WT\_S in SB-medium (liquid) (Fig. S3b). In addition, the internal pH of *E. coli* TK 2309 (pXMJ19\_mCherryEA) (TK 2309\_S) grown as colonies on agar plates was determined to be  $7.39 \pm 0.05$  (Fig. 3d). An internal pH of  $7.22 \pm 0.02$  was measured for TK 2309\_S liquid cultures in SB-medium (Fig. S3b). By this means, that for both liquid cultures as well as the imaging method on agar plates, the internal pH of *E. coli* MG 1655 was significantly higher when compared to the TK 2309 mutant. Despite the differences with respect to their internal pH, no growth deficit was observed in liquid SB media for the TK2309\_S strain when compared to the WT\_S strain (Fig. S3a). Taken together, the results successfully revealed that:

- i) the sensor protein mCherryEA is functional in colonies on agar plates and this method can be used to directly assess the  $pH_{in}$  from bacterial colonies on agar plates.
- ii) imaging of the  $pH_{in}$  via the FRP (mCherryEA) signals from colonies on agar plates allows to distinguish colonies with impaired pH-homeostasis capabilities from those with a normal pH-homeostasis, under conditions which do not negatively affect growth patterns.

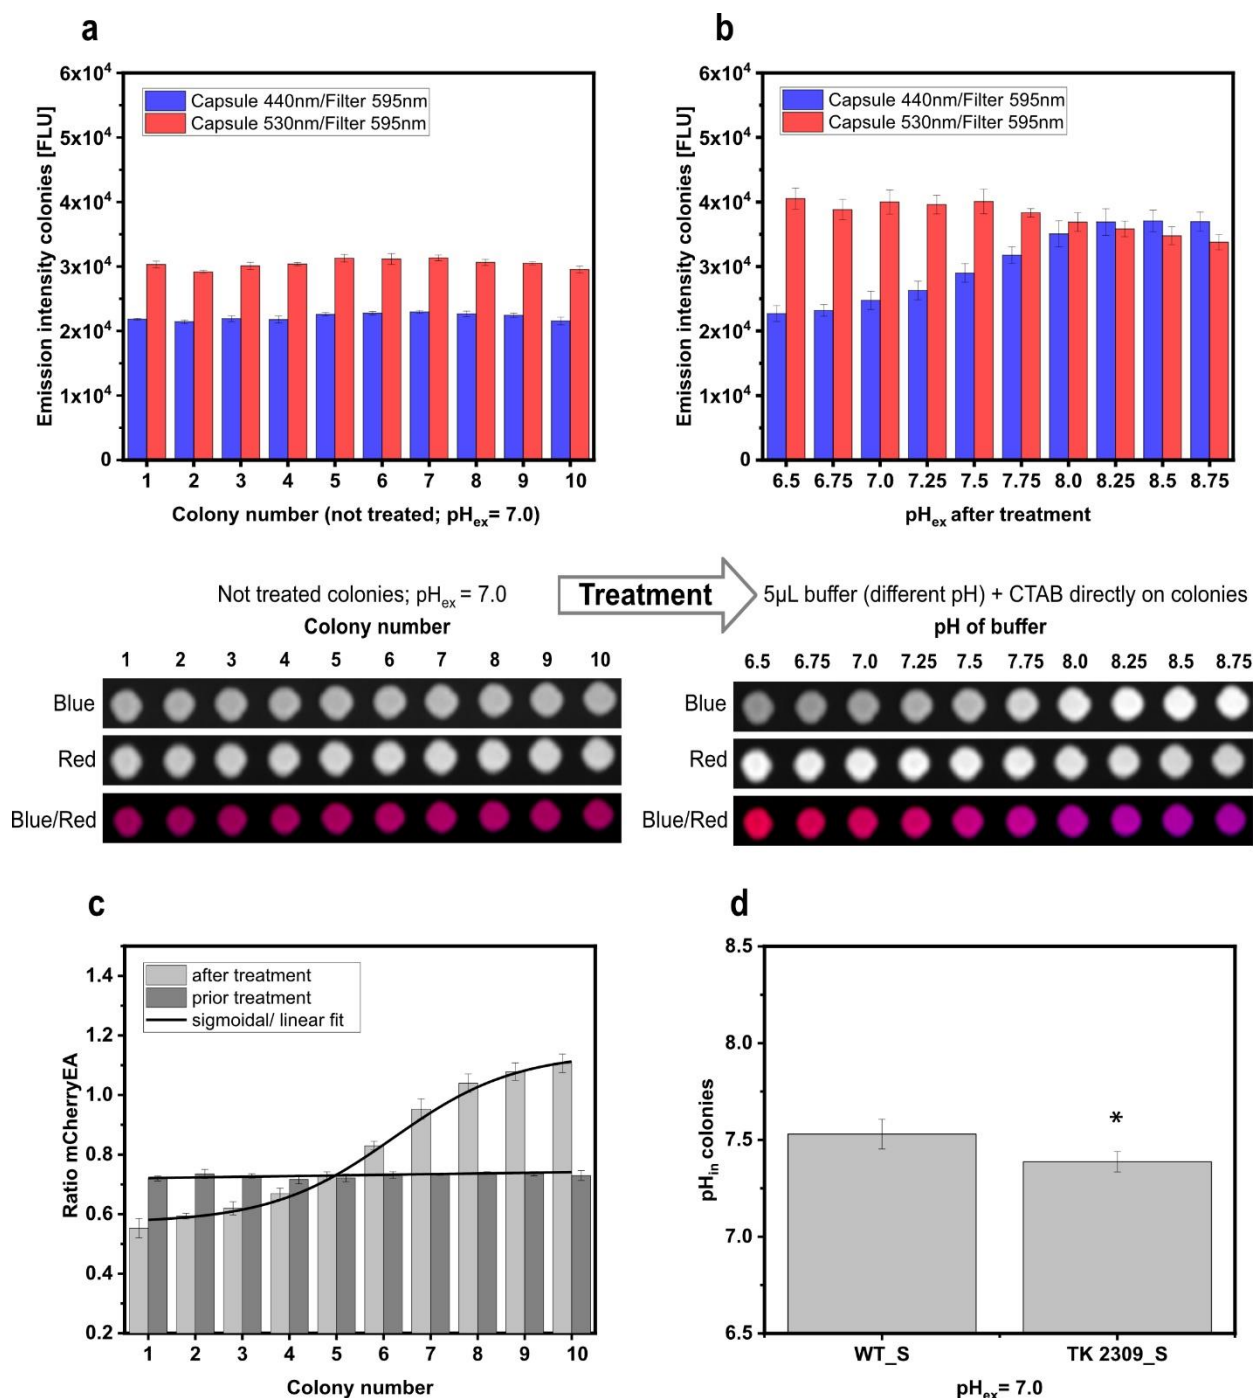

447

448 Figure 3: mCherryEA biosensor signals in *E. coli* MG 1655 (pXMJ19\_mCherryEA) arrayed colonies on agar plate without any  
 449 treatment (a) and after adding buffer with different pH values directly on the respective colonies (b). Calculated ratios prior and  
 450 after treatment of the colonies (c) and determination of the internal pH values of *E. coli* MG 1655 (pXMJ19\_mCherryEA) (WT\_S)  
 451 and *E. coli* TK 2309 (pXMJ19\_mCherryEA) (TK 2309\_S) (d). 1 M PBS buffer with different set pH values was supplemented with  
 452 cetyltrimethylammonium bromide (CTAB; final concentration 0.05 % (w/v)). Internal pH values were analyzed with one-way-  
 453 Anova followed by Tukey's test ( $n.s$   $p > 0.05$ ; \*  $p \leq 0.05$ ). Error bars represent standard deviation from at least three replicates.

454

### 3.3 Fluorescent reporter protein-based screening of an *E. coli* transposon mutant library

To finally validate the concept of using a FRP- sensor to screen a strain library cultivated as colonies on agar plates, a Tn5 transposon mutant library of *E. coli* MG1655 was created and transformed with the plasmid pXMJ19\_ *mCherryEA*. Linker-PCR experiments revealed the expected heterogeneity of Tn5 insertion sites for isolates of the mutant library before and after transformation of the sensor plasmid (Fig. S4). Single colonies of the *E. coli* Tn5 mutant library carrying pXMJ19\_ *mCherryEA* were picked randomly and transferred to single wells filled with SB-medium in 96-well plates by the use of a QPix420 microbial colony picker. 96-well plates were cultivated over-night and then arrayed on SB-agar plates (pH 7.0, 1 mM IPTG) using a ROTOR HDA. After cultivation of the 384 clones arrayed on three SB-agar plates (128 each) at 37°C for 24 hours, the plates were imaged using the Vilber Fusion FX system. The average ratio of all colonies on the screening agar plates (Fig. 4a; Fig. S5a, b) was determined to be  $0.50 \pm 0.04$ . In Fig. 4a the sensor ratio distribution and respective fluorescence image of one screening plate is depicted. Sensor analysis revealed a colony possessing a reduced ratio of 0.44 (TP1) and another colony which ratio was drastically increased 0.78 (TP2). For all other colonies such a rational decision was not possible. However, one further colony located in the lower range of the colony ratios (TP 3; 0.48) and in the higher (TP 5; 0.59) were isolated for further analysis. Another interesting phenotype (Screening plate 1; Fig. S5a) was isolated due to its different morphological structure compared to the other colonies growing on the screening agar plate, even though the ratio of this mutant was just slightly increased with 0.55 (Fig. S5a). From screening plate 2 no mutant was selected, however, the fluorescence images as well as all analyzed ratios are provided in Fig. S5b.

The follow-up fluorescence imaging analysis of these five transposon mutants on SB-agar plates (pH 7.0; Fig. 4b) revealed indeed an acidification of the internal pH for *E. coli* TP 1 ( $\text{pH}_{\text{in}}$  of  $6.91 \pm 0.12$ ) and *E. coli* TP 3 ( $\text{pH}_{\text{in}}$   $7.37 \pm 0.08$ ) when compared to the  $\text{pH}_{\text{in}}$  of  $7.53 \pm 0.08$  measured for the reference strain *E. coli* MG 1655 (pXMJ19\_ *mCherryEA*) (Fig. 4c). No significant difference of  $\text{pH}_{\text{in}}$  in comparison to the

reference strain was measured for colonies of *E. coli* TP 4 ( $\text{pH}_{\text{in}}$   $7.44 \pm 0.06$ ; Fig. 4c). In contrast to the sensor signals of *E. coli* mutants TP 1, TP 3 and TP 4, the detected biosensor signals for the mutants TP 2 and TP 5 were very low (Fig. 4b). This observation indicates that the biosensor gene was weakly expressed in the two mutants *E. coli* TP2 (TN-insertions at *cusF*) and *E. coli* TP5 (TN-insertion at *ypaD*), which does not allow reliable analysis of the ratiometric signals of the pH-sensor protein for these two strains (Fig. 4b, c).

For *E. coli* TP1 the Tn5 insertion was mapped to the *rssB* gene, which encodes the adaptor protein RssB, which is in the control of degradation of  $\sigma^S$  encoded by *rpoS* (Ruiz *et al.*, 2001; Pruteanu and Hengge-Aronis, 2002). For *E. coli* TP 3 the *trkH* gene for the major potassium uptake system TrkH (Schlosser *et al.*, 1995) was found to be disrupted by the transposon. For the Tn5-mutagenesis derived strain *E. coli* TP4, the gene *bcsA*, encoding the cellulose synthase BcsA (Serra *et al.*, 2013) was found to be disrupted. BcsA contributes to the synthesis of cellulose, a mayor structural composite required for biofilm formation (Serra *et al.*, 2013). Lack of BcsA could underlie the observed altered colony morphology of *E. coli* TP4 on the screening SB-agar plate (Fig. S5a). After re-spotting this strain, however, the morphologically changed structure of the colony was not reproducible but similar to the morphology of the other mutants. For BcsA, no involvement in pH-homeostasis has been reported. This is in agreement to the similar  $\text{pH}_{\text{in}}$ -values measured for *E. coli* TP4 and the reference strain when cultivated on SB-agar plates (Fig. 4c).

To further validate the results,  $\text{pH}_{\text{in}}$  of the Tn5-mutants *E. coli* TP1, *E. coli* TP3 and *E. coli* TP4 was analyzed for liquid cultures in minimal medium at different  $\text{pH}_{\text{ex}}$  values and potassium concentrations after one hour of incubation (Fig. 4d). In presence of 120 mM potassium and a  $\text{pH}_{\text{ex}}$  of 6.0,  $\text{pH}_{\text{in}}$  values of  $7.35 \pm 0.02$  and  $7.15 \pm 0.19$  were measured for *E. coli* TP1 and *E. coli* TP3, respectively, which are significantly lower values when compared to a  $\text{pH}_{\text{in}}$  of  $7.63 \pm 0.08$  measured for WT\_S (Fig. 4d). In case of *E. coli* TP3, this value is almost identical to the  $\text{pH}_{\text{in}}$  value of  $7.14 \pm 0.15$  of TK 2309\_S (Fig. 4d). Upon exposure to a  $\text{pH}_{\text{ex}}$  of 8.0 and in presence of 120 mM potassium, the  $\text{pH}_{\text{in}}$  values of both *E. coli* TP3 and TK 2309\_S mutant ( $\text{pH}_{\text{in}}$



503  $7.97 \pm 0.07$  and  $pH_{in}$   $8.06 \pm 0.05$ , respectively) were not significantly different from the  $pH_{in}$  of  $7.88 \pm 0.08$   
 504 measured for WT\_S, whereas the  $pH_{in}$  of *E. coli* TP1 remained at  $7.18 \pm 0.09$  (Fig. 4d). At low potassium  
 505 concentrations (0.1 mM) and a  $pH_{ex}$  of 6.0 neutral to slightly acidic  $pH_{in}$  values were determined for all  
 506 strains. In detail a  $pH_{in}$  of  $7.05 \pm 0.01$  was measured for *E. coli* TP 1 and a  $pH_{in}$  of  $6.96 \pm 0.03$  for WT\_S, a  
 507  $pH_{in}$  of  $6.86 \pm 0.03$  for *E. coli* TP 3, and the lowest  $pH_{in}$  of  $6.55 \pm 0.02$  was measured in TK2309\_S. To note,  
 508 when setting an external pH of 8 and in presence of low potassium concentrations, still a neutral  $pH_{in}$  of  
 509  $7.17 \pm 0.1$  was determined for *E. coli* TP 1. In contrast, under these conditions *E. coli* TP 3 and WT\_S  
 510 revealed more alkaline  $pH_{in}$  values of  $7.75 \pm 0.1$  and  $7.85 \pm 0.04$ , respectively. A  $pH_{in}$  of  $7.37 \pm 0.06$  was  
 511 determined for *E. coli* TK 2309\_S (Fig. 4d). As expected from the analyses on SB-agar plates, for all four  
 512 tested cultivation conditions no significant differences of  $pH_{in}$  values of *E. coli* TP 4 when compared to  
 513 these of the reference strain WT\_S were observed (Fig. 4d).

514 These results show that the *E. coli* TP1 and *E. coli* TP3, identified *via* image analysis of colonies on SB-agar  
 515 plates as candidates with altered pH-homeostasis properties, revealed Tn5 insertions in genes known to  
 516 be involved in pH-homeostasis or pH-stress adaptation (Roe *et al.*, 2000; Battesti *et al.*, 2011). For the  
 517 Tn5-mutant defective in *rssB* (TP1), it should be highlighted that this strain maintained a stable neutral  
 518  $pH_{in}$  between 7.0 and 7.2, independent of the here applied external conditions with respect to both  $pH_{ex}$   
 519 as well as potassium concentrations. This observed phenotype of *E. coli* TP1 is probably brought by  
 520 constitutively high levels of the  $\sigma^S$  (RpoS), which in turn might lead to increased transcription of genes for  
 521 the general stress response in *E. coli* (Battesti *et al.*, 2011; Gottesman, 2019). This can be explained by the  
 522 functionality of *rssB*, as it mediates  $\sigma^S$  degradation by the ATP-dependent protease ClpXP in absence of  
 523 any stress (Muffler *et al.*, 1996; Dorich *et al.*, 2019). Consequently, inactivation of the *rssB* gene leads to  
 524 a constant “ON”-state of the general stress response because of the absence of the proteolytic  
 525 degradation of RpoS. For *E. coli* TP3, which carries the Tn5 insertion within the *trkH* gene, it might irritate  
 526 that the difference of  $pH_{in}$  (compared to the reference strain WT\_S) was only detected to be significant in

527 presence of high amounts of potassium. However, expression of genes for potassium systems is repressed  
 528 in presence of high potassium concentrations in *E. coli* (Laermann *et al.*, 2013; Schramke *et al.*, 2016),  
 529 which in turn causes alterations of  $pH_{in}$  in *trkH*-deficient strains also at potassium concentrations above  
 530 20 mM (Roe *et al.*, 2000).

531 Taken together, the use of a FRP sensor for internal pH measurements (mCherryEA) was successfully  
 532 applied to identify mutants on agar plates with altered internal pH levels, which subsequently was verified  
 533 in liquid cultures. This illustrates the potential and flexibility brought by FRP sensors as it can be applied  
 534 for both real-time monitoring as well as screening purposes, two methods of great importance to  
 535 understand intracellular processes mechanistically. The efficiency of a screening method is determined by  
 536 its signal to noise ratio. The ratiometric characteristic of many FRPs, like the here applied mCherryEA,  
 537 provide the advantage that the biosensor signal is independent of the absolute amount of sensor  
 538 molecules and thus differences in expression strength within the library do not affect the sensor signal.  
 539 To note, combinatorial sensor set-ups (TFBs and FRPs) could capture both actual intracellular values  
 540 (metabolite concentration or physiological states) and more regulatory elements (activation or repression  
 541 of genetic circuits). Gaining insights of both is key for a systematic and profound physiological  
 542 characterization of engineered platform organisms for industrial Biotechnology. Thus, the here  
 543 established method provides a first step towards implementing fast sensor proteins in a routinely manner  
 544 at an early stage such as screening of mutant libraries for a better understanding of molecular  
 545 mechanisms.

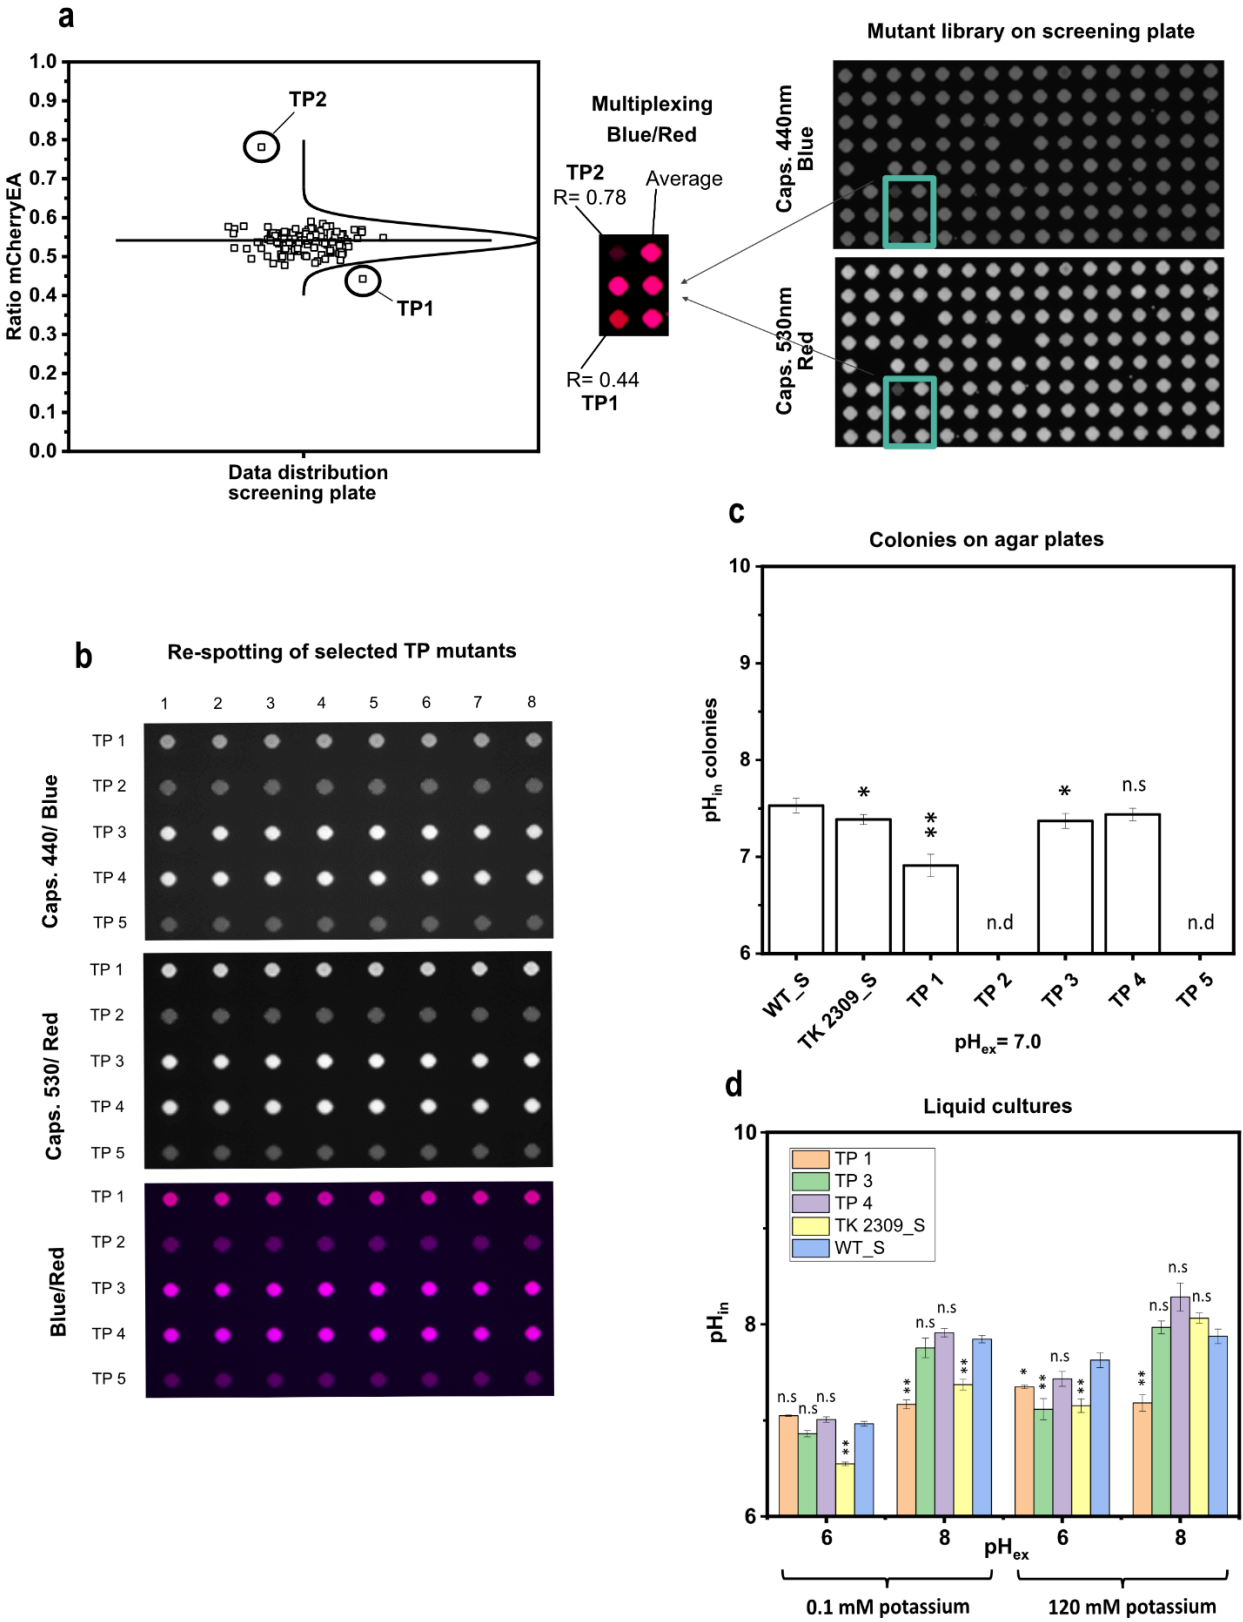

Figure 4: Fluorescence image of a screening plate with transposon derived mutants of *E. coli* MG1655 equipped with the pH sensor plasmid pXMJ19\_mCherryEA (a) and different selected transposon mutants re-spotted in eight replicates on SB- agar plates (b). The respective internal pH of eight replicates for the selected transposon mutants was determined and compared to *E. coli* MG 1655 (pXMJ19\_mCherryEA) (WT\_S) and *E. coli* TK 2309 (pXMJ19\_mCherryEA) (TK 2309\_S) (c). Internal pH levels of selected transposon mutants was verified and compared to WT\_S and TK 2309\_S strains in liquid media (minimal medium K<sub>0.1</sub> and K<sub>120</sub>) at different external set pH values (d). Error bars represent standard deviation of at least three replicates. Statistical analysis was performed via One-Way-Anova followed by a Tukey's test (<sup>n.s</sup> p > 0.05; \* p ≤ 0.05; \*\* p ≤ 0.01). Internal pH was not determined (n.d) for TP 2 and TP 5 mutants due to its weak biosensor expression.

555

## 556 4 Conclusion

High-throughput arrays of bacterial strain libraries on agar plates have become a versatile tool for phenotypic analysis towards a comprehensive understanding of gene functions and interactions in microorganisms in various cultivation conditions (Côté *et al.*, 2016; Peters *et al.*, 2016; Galardini *et al.*, 2017). The use of genetically encoded sensors offer additional possibilities to investigate strain libraries for a single physiological parameter besides growth (Germond *et al.*, 2016; Sanford and Palmer, 2017; Sarnaik *et al.*, 2020) and the combination of transcription-factor-based biosensors (TFBs) with phenotypic arrays on agar plates enabled comprehensive, non-destructive, temporally resolved gene expression studies (French *et al.*, 2018). In contrast to this type of biosensor, fluorescent reporter proteins (FRPs) are commonly used in microorganisms for real-time monitoring of fast internal kinetics upon an environmental trigger (Bermejo *et al.*, 2011a; Martynov *et al.*, 2018; Depaoli *et al.*, 2019). On the one hand, their fast response is a challenge for their use in FACS- based screening approaches. On the other hand, this characteristic provides to measure the actual state of the cell rather than measuring physiological states or metabolite concentrations from the past. In this communication, the FRP- based genetically encoded pH-sensor mCherryEA was successfully applied to screen *E. coli* mutant colonies arrayed on agar plates via fluorescence imaging. By exchanging the filters of the imaging system towards the properties of other sensor proteins, the here developed technology can be applied for other metabolites and physiological states in colonies and thus become a versatile first step in comprehensive phenotypic analysis of genome-wide libraries of bacterial strains using FRP- based biosensors.

## 575 **Funding**

576 This work was funded by the Novo Nordisk Fonden within the framework of the Fermentation- based  
577 Biomanufacturing Initiative (FBM) (FBM-grant: NNF17SA0031362).

578

## 579 **Availability of data and materials**

580 All data generated and analyzed during this study are included in this article and its additional files. Raw  
581 datasets are available from the corresponding author on reasonable request.

582

## 583 **Conflict of Interest**

584 The authors declare that the research was conducted in the absence of any commercial or financial  
585 relationships that could be construed as a potential conflict of interest.

586

## 587 **Acknowledgment**

588 We would like to thank the Fermentation Core at DTU Bioengineering for excellent technical support  
589 and the members of the COST Action “Understanding and exploiting the impacts of low pH on  
590 microorganisms” (EuroMicropH) CA18113 for very helpful discussions.

591

## 592 **References**

- 593 Battesti, A., Majdalani, N., and Gottesman, S. (2011) The RpoS-mediated general stress response in  
594 *Escherichia coli*. *Annu Rev Microbiol* **65**: 189–213.
- 595 Bermejo, C., Ewald, J.C., Lanquar, V., Jones, A.M., and Frommer, W.B. (2011a) *In vivo* biochemistry:  
596 Quantifying ion and metabolite levels in individual cells or cultures of yeast. *Biochem J* **438**: 1–10.
- 597 Bermejo, C., Haerizadeh, F., Takanaga, H., Chermak, D., and Frommer, W.B. (2011b) Optical sensors for  
598 measuring dynamic changes of cytosolic metabolite levels in yeast. *Nat Protoc* **6**: 1806–1817.
- 599 Bertani, G. (2004) Lysogeny at mid-twentieth century: P1, P2, and other experimental systems. *J*  
600 *Bacteriol* **186**: 595–600.
- 601 Blattner, F.R., Plunkett, G., Bloch, C.A., Perna, N.T., Burland, V., Riley, M., *et al.* (1997) The complete  
602 genome sequence of *Escherichia coli* K-12. *Science* **277**: 1453–1462.
- 603 Botman, D., Heerden, J.H. van, and Teusink, B. (2020) An improved ATP FRET sensor for yeast shows  
604 heterogeneity during nutrient transitions. *ACS sensors* **5**: 814–822.
- 605 Bushell, F., Herbert, J.M.J., Sannasiddappa, T.H., Warren, D., Keith Turner, A., Falciani, F., and Lund, P.A.  
606 (2021) Mapping the transcriptional and fitness landscapes of a pathogenic *E. coli* strain: The effects of  
607 organic acid stress under aerobic and anaerobic conditions. *Genes* **12**: 53.
- 608 Cella, J.A., Eggenberger, D.N., Noel, D.R., Harriman, L.A., and Harwood, H.J. (1952) The relation of  
609 structure and critical concentration to the bactericidal activity of quaternary ammonium salts. *J Am*

610 *Chem Soc* **74**: 2061–2062.

611 Côté, J.P., French, S., Gehrke, S.S., MacNair, C.R., Mangat, C.S., Bharat, A., and Brown, E.D. (2016) The  
612 genome-wide interaction network of nutrient stress genes in *Escherichia coli*. *MBio* **7**: e01714-16.

613 Crauwels, P., Schäfer, L., Weixler, D., Bar, N.S., Diep, D.B., Riedel, C.U., and Seibold, G.M. (2018)  
614 Intracellular pHluorin as sensor for easy assessment of bacteriocin-induced membrane-damage in  
615 *Listeria monocytogenes*. *Front Microbiol* **9**: 1–10.

616 Deng, H., Li, J., Zhou, Y., Xia, Y., Chen, C., Zhou, Z., *et al.* (2021) Genetic engineering of circularly  
617 permuted yellow fluorescent protein reveals intracellular acidification in response to nitric oxide stimuli.  
618 *Redox Biol* **41**: 101943.

619 Depaoli, M.R., Bischof, H., Eroglu, E., Burgstaller, S., Ramadani-Muja, J., Rauter, T., *et al.* (2019) Live cell  
620 imaging of signaling and metabolic activities. *Pharmacol Ther* **202**: 98–119.

621 Dorich, V., Brugger, C., Tripathi, A., Hoskins, J.R., Tong, S., Suhanovsky, M.M., *et al.* (2019) Structural  
622 basis for inhibition of a response regulator of  $\sigma$ S stability by a ClpXP antiadaptor. *Genes Dev* **33**: 718–  
623 732.

624 Eggeling, L., Bott, M., and Marienhagen, J. (2015) Novel screening methods-biosensors. *Curr Opin*  
625 *Biotechnol* **35**: 30–36.

626 Eikmanns, B.J., Kleinertz, E., Liehl, W., and Sahm, H. (1991) A family of *Corynebacterium*  
627 *glutamicum*/*Escherichia coli* expression and promoter probing. *Plasmid* **102**: 93–98.

628 Epstein, W. (1986) Osmoregulation by potassium transport in *Escherichia coli*. *FEMS Microbiol Lett* **39**:  
629 73–78.

630 Epstein, W., and Kim, B.S. (1971) Potassium transport loci in *Escherichia coli* K-12. *J Bacteriol* **108**: 639–  
631 644.

632 French, S., Coutts, B.E., and Brown, E.D. (2018) Open-source high-throughput phenomics of bacterial  
633 promoter-reporter strains. *Cell Syst* **7**: 339–346.

634 Galardini, M., Koumoutsis, A., Herrera-Dominguez, L., Varela, J.A.C., Telzerow, A., Wagih, O., *et al.* (2017)  
635 Phenotype inference in an *Escherichia coli* strain panel. *Elife* **6**: e31035.

636 Germond, A., Fujita, H., Ichimura, T., and Watanabe, T.M. (2016) Design and development of genetically  
637 encoded fluorescent sensors to monitor intracellular chemical and physical parameters. *Biophys Rev* **8**:  
638 121–138.

639 Goldbeck, O., Eck, A.W., and Seibold, G.M. (2018) Real time monitoring of NADPH concentrations in  
640 *Corynebacterium glutamicum* and *Escherichia coli* via the genetically encoded sensor mBFP. *Front*  
641 *Microbiol* **9**: 1–10.

642 Gottesman, S. (2019) Trouble is coming: Signaling pathways that regulate general stress responses in  
643 bacteria. *J Biol Chem* **294**: 11685–11700.

644 Guan, N., and Liu, L. (2020) Microbial response to acid stress: mechanisms and applications. *Appl*  
645 *Microbiol Biotechnol* **104**: 51–65.

646 Guerrero-Castro, J., Lozano, L., and Sohlenkamp, C. (2018) Dissecting the acid stress response of  
647 *Rhizobium tropici* CIAT 899. *Front Microbiol* **9**: 846.

- 648 Han, J., and Burgess, K. (2010) Fluorescent indicators for intracellular pH. *Chem Rev* **110**: 2709–2728.
- 649 Hartmann, F.S.F., Clermont, L., Tung, Q.N., Antelmann, H., and Seibold, G.M. (2020) The industrial  
650 organism *Corynebacterium glutamicum* requires mycothiol as antioxidant to resist against oxidative  
651 stress in bioreactor cultivations. *Antioxidants* **9**: 1–13.
- 652 Hayes, E.T., Wilks, J.C., Sanfilippo, P., Yohannes, E., Tate, D.P., Jones, B.D., *et al.* (2006) Oxygen limitation  
653 modulates pH regulation of catabolism and hydrogenases, multidrug transporters and envelope  
654 composition in *Escherichia coli* K-12. *BMC Microbiol* **6**: 1–18.
- 655 Heins, A.L., Reyelt, J., Schmidt, M., Kranz, H., and Weuster-Botz, D. (2020) Development and  
656 characterization of *Escherichia coli* triple reporter strains for investigation of population heterogeneity in  
657 bioprocesses. *Microb Cell Fact* **19**: 1–20.
- 658 Ito, M., Morino, M., and Krulwich, T.A. (2017) Mrp antiporters have important roles in diverse bacteria  
659 and archaea. *Front Microbiol* **8**: 2235.
- 660 Jakoby, M., Carole-Estelle, Ngouoto-Nkili, and Burkovski, A. (1999) Construction and application of new  
661 *Corynebacterium glutamicum* vectors. *Biotechnol Tech* **13**: 437–441.
- 662 Kashket, E.R. (1985) The proton motive force in bacteria: A critical assessment of methods. *Annu Rev*  
663 *Microbiol* **39**: 219–242.
- 664 Koch, M., Pandi, A., Borkowski, O., Cardoso Batista, A., and Faulon, J.L. (2019) Custom-made  
665 transcriptional biosensors for metabolic engineering. *Curr Opin Biotechnol* **59**: 78–84.
- 666 Krulwich, T.A., Sachs, G., and Padan, E. (2011) Molecular aspects of bacterial pH sensing and  
667 homeostasis. *Nat Rev Microbiol* **9**: 330–343.
- 668 Laermann, V., Ćudić, E., Kipschull, K., Zimmann, P., and Altendorf, K. (2013) The sensor kinase KdpD of  
669 *Escherichia coli* senses external K<sup>+</sup>. *Mol Microbiol* **88**: 1194–1204.
- 670 Lund, P., Tramonti, A., and Biase, D. De (2014) Coping with low pH: Molecular strategies in neutrophilic  
671 bacteria. *FEMS Microbiol Rev* **38**: 1091–1125.
- 672 Lund, P.A., Biase, D. De, Liran, O., Scheler, O., Mira, N.P., Cetecioglu, Z., *et al.* (2020) Understanding how  
673 microorganisms respond to acid pH is central to their control and successful exploitation. *Front*  
674 *Microbiol* **11**: 2233.
- 675 Maglica, Ž., Özdemir, E., and McKinney, J.D. (2015) Single-cell tracking reveals antibiotic-induced  
676 changes in mycobacterial energy metabolism. *MBio* **6**: e02236-14.
- 677 Martinez, K.A., Kitko, R.D., Mershon, J.P., Adcox, H.E., Malek, K.A., Berkmen, M.B., and Slonczewski, J.L.  
678 (2012) Cytoplasmic pH response to acid stress in individual cells of *Escherichia coli* and *Bacillus subtilis*  
679 observed by fluorescence ratio imaging microscopy. *Appl Environ Microbiol* **78**: 3706–14.
- 680 Martynov, V.I., Pakhomov, A.A., Deyev, I.E., and Petrenko, A.G. (2018) Genetically encoded fluorescent  
681 indicators for live cell pH imaging. *Biochim Biophys Acta - Gen Subj* **1862**: 2924–2939.
- 682 Maurer, L.M., Yohannes, E., Bondurant, S.S., Radmacher, M., and Slonczewski, J.L. (2005) pH regulates  
683 genes for flagellar motility, catabolism, and oxidative stress in *Escherichia coli* K-12. *J Bacteriol* **187**: 304–  
684 319.
- 685 Miesenböck, G., Angelis, D.A. De, and Rothman, J.E. (1998) Visualizing secretion and synaptic



686 transmission with pH-sensitive green fluorescent proteins. *Nature* **394**: 192–195.

687 Mira, N.P., Palma, M., Guerreiro, J.F., and Sá-Correia, I. (2010) Genome-wide identification of  
688 *Saccharomyces cerevisiae* genes required for tolerance to acetic acid. *Microb Cell Fact* **9**: 1–13.

689 Monteiro, F., Hubmann, G., Takhaviev, V., Vedelaar, S.R., Norder, J., Hekelaar, J., *et al.* (2019) Measuring  
690 glycolytic flux in single yeast cells with an orthogonal synthetic biosensor. *Mol Syst Biol* **15**: e9071.

691 Muffler, A., Fischer, D., Altuvia, S., Storz, G., and Hengge-Aronis, R. (1996) The response regulator RssB  
692 controls stability of the  $\sigma$ S subunit of RNA polymerase in *Escherichia coli*. *EMBO J* **15**: 1333–1339.

693 Palud, A., Scornec, H., Cavin, J.F., and Licandro, H. (2018) New genes involved in mild stress response  
694 identified by transposon mutagenesis in *Lactobacillus paracasei*. *Front Microbiol* **9**: 535.

695 Peters, J.M., Colavin, A., Shi, H., Czarny, T.L., Larson, M.H., Wong, S., *et al.* (2016) A comprehensive  
696 CRISPR-based functional analysis of essential genes in bacteria. *Cell* **165**: 1493–1506.

697 Piatkevich, K.D., Malashkevich, V.N., Almo, S.C., and Verkhusha, V. V. (2010) Engineering ESPT pathways  
698 based on structural analysis of LSSmKate red fluorescent proteins with large stokes shift. *J Am Chem Soc*  
699 **132**: 10762–10770.

700 Pruteanu, M., and Hengge-Aronis, R. (2002) The cellular level of the recognition factor RssB is rate-  
701 limiting for  $\sigma$ S proteolysis: Implications for RssB regulation and signal transduction in  $\sigma$ S turnover in  
702 *Escherichia coli*. *Mol Microbiol* **45**: 1701–1713.

703 Rajendran, M., Claywell, B., Haynes, E.P., Scales, U., Henning, C.K., and Tantama, M. (2018) Imaging pH  
704 dynamics simultaneously in two cellular compartments using a ratiometric pH-sensitive mutant of  
705 mCherry. *ACS Omega* **3**: 9476–9486.

706 Reva, O.N., Weinel, C., Weinel, M., Böhm, K., Stjepandic, D., Hoheisel, J.D., and Tümmler, B. (2006)  
707 Functional genomics of stress response in *Pseudomonas putida* KT2440. *J Bacteriol* **188**: 4079–4092.

708 Reyes-Fernández, E.Z., and Schuldiner, S. (2020) Acidification of cytoplasm in *Escherichia coli* provides a  
709 strategy to cope with stress and facilitates development of antibiotic resistance. *Sci Rep* **10**: 1–13.

710 Roe, A.J., McLaggan, D., O’Byrne, C.P., and Booth, I.R. (2000) Rapid inactivation of the *Escherichia coli*  
711 Kdp K<sup>+</sup> uptake system by high potassium concentrations. *Mol Microbiol* **35**: 1235–1243.

712 Ruiz, N., Peterson, C.N., and Silhavy, T.J. (2001) RpoS-dependent transcriptional control of sprE:  
713 Regulatory feedback loop. *J Bacteriol* **183**: 5974–5981.

714 Sambrook, J., Fritsch, E.F., and Maniatis, T. (1989) Molecular cloning: a laboratory manual. No. Ed. 2.,  
715 Cold spring harbor laboratory press, .

716 Sanford, L., and Palmer, A. (2017) Recent advances in development of genetically encoded fluorescent  
717 sensors. *Methods Enzymol* **589**: 1–49.

718 Sarnaik, A., Liu, A., Nielsen, D., and Varman, A.M. (2020) High-throughput screening for efficient  
719 microbial biotechnology. *Curr Opin Biotechnol* **64**: 141–150.

720 Schallmeyer, M., Frunzke, J., Eggeling, L., and Marienhagen, J. (2014) Looking for the pick of the bunch:  
721 high-throughput screening of producing microorganisms with biosensors. *Curr Opin Biotechnol* **26**: 148–  
722 154.

723 Schlosser, A., Meldorf, M., Stumpe, S., Bakker, E.P., and Epstein, W. (1995) TrkH and its homolog, TrkG,



724 determine the specificity and kinetics of cation transport by the Trk system of *Escherichia coli*. *J Bacteriol*  
725 **177**: 1908–1910.

726 Schramke, H., Tostevin, F., Heermann, R., Gerland, U., and Jung, K. (2016) A dual-sensing receptor  
727 confers robust cellular homeostasis. *Cell Rep* **16**: 213–221.

728 Serra, D.O., Richter, A.M., and Hengge, R. (2013) Cellulose as an architectural element in spatially  
729 structured *Escherichia coli* biofilms. *J Bacteriol* **195**: 5540–5554.

730 Shin, J., Zhang, S., Der, B.S., Nielsen, A.A.K., and Voigt, C.A. (2020) Programming *Escherichia coli* to  
731 function as a digital display. *Mol Syst Biol* **16**: 1–12.

732 Slonczewski, J.L., Fujisawa, M., Dopson, M., and Krulwich, T.A. (2009) Cytoplasmic pH measurement and  
733 homeostasis in bacteria and archaea. *Adv Microb Physiol* **55**: 1–317.

734 Studier, F.W., and Moffatt, B.A. (1986) Use of bacteriophage T7 RNA polymerase to direct selective high-  
735 level expression of cloned genes. *J Mol Biol* **189**: 113–130.

736 Tantama, M., Hung, Y.P., and Yellen, G. (2011) Imaging intracellular pH in live cells with a genetically  
737 encoded red fluorescent protein sensor. *J Am Chem Soc* **133**: 10034–10037.

738

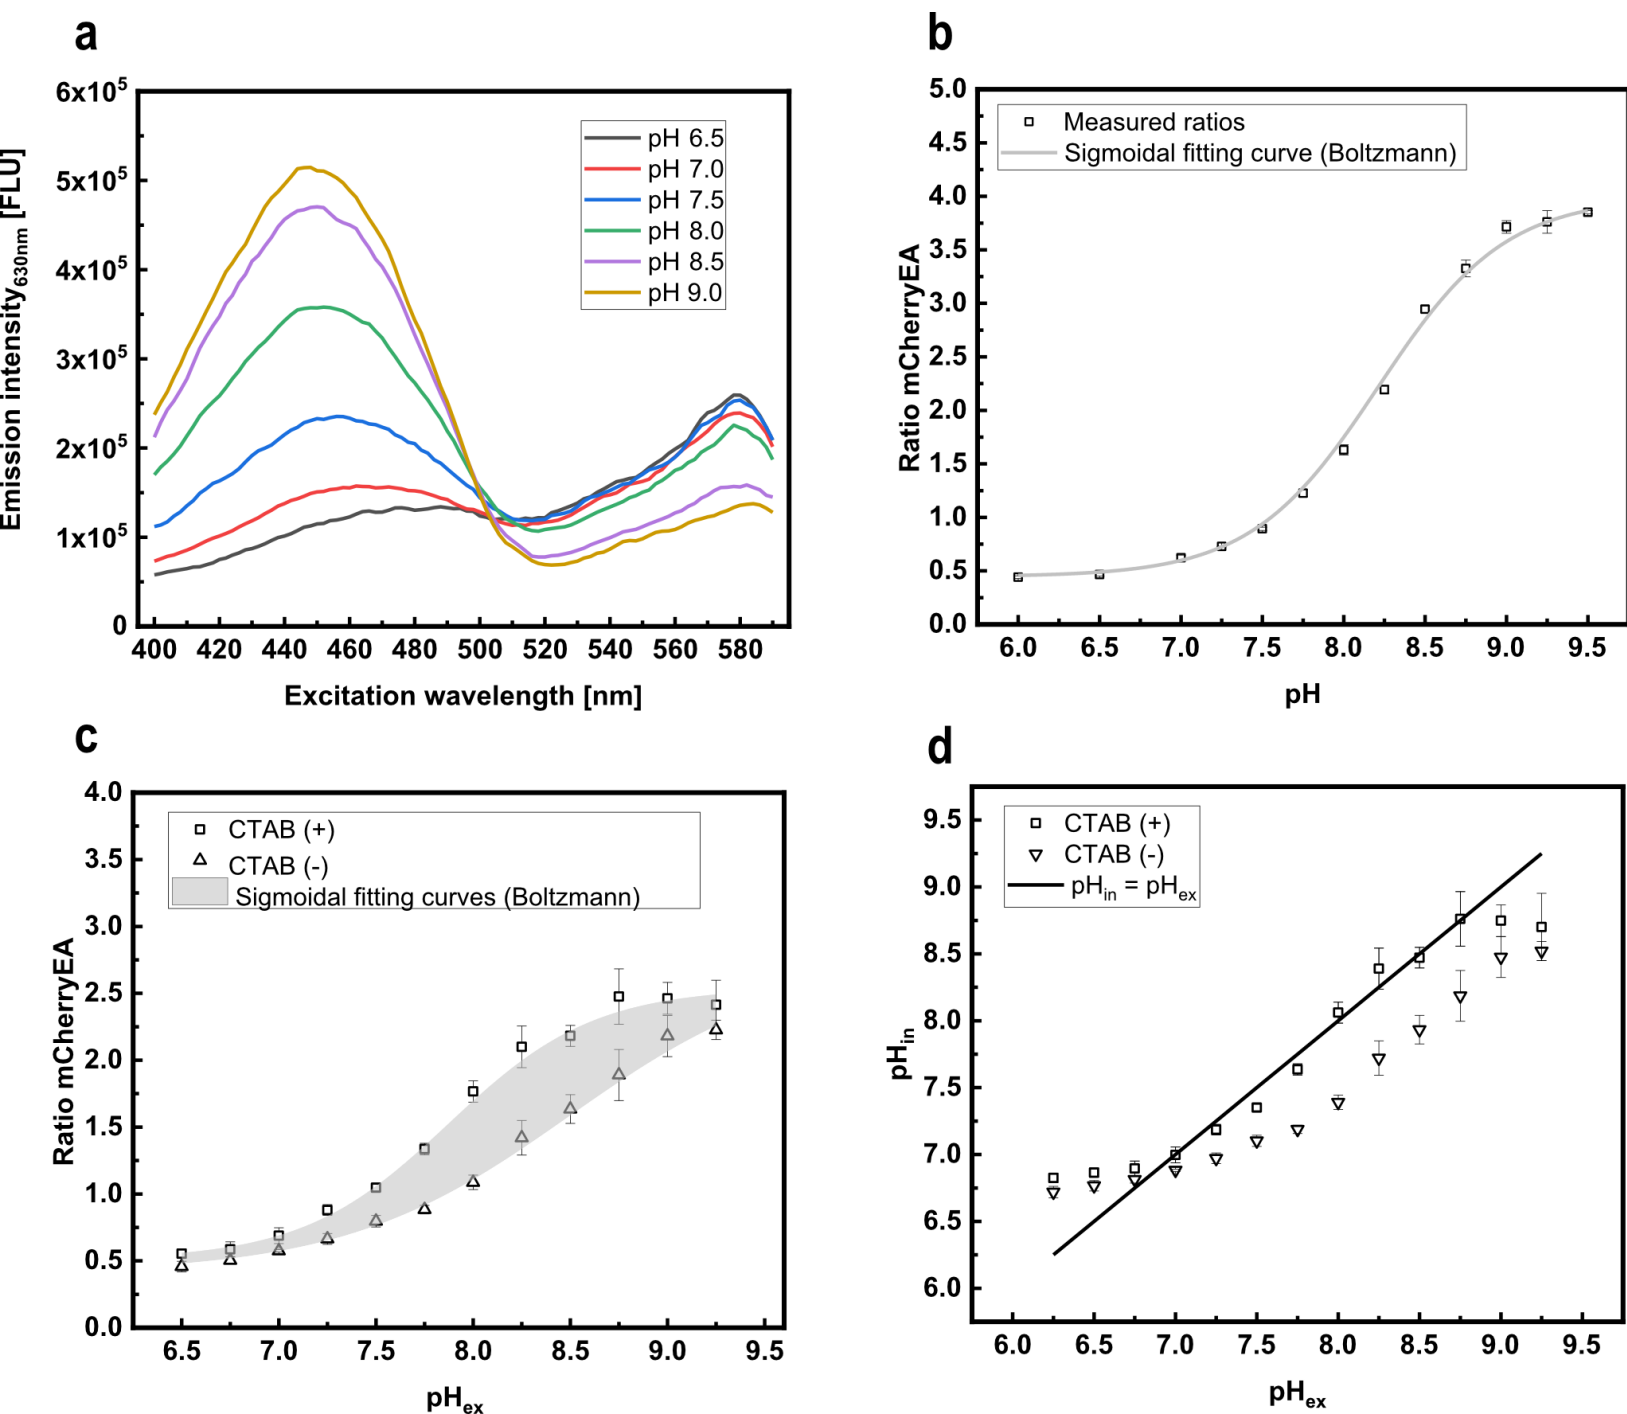

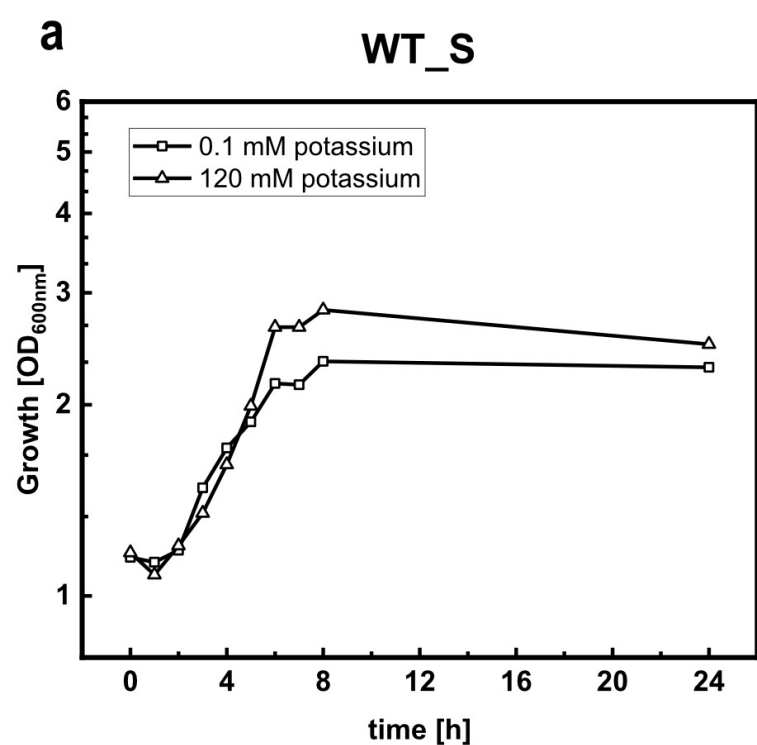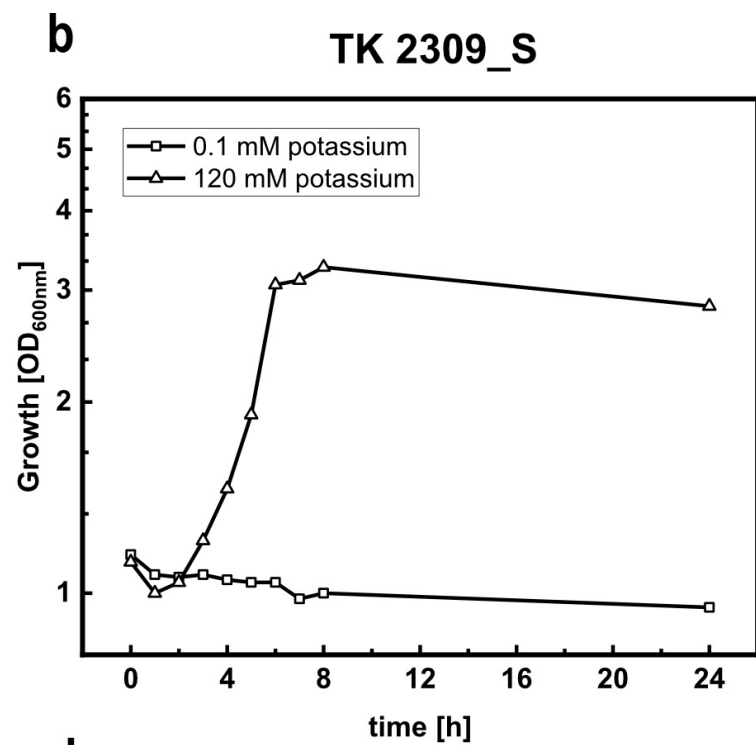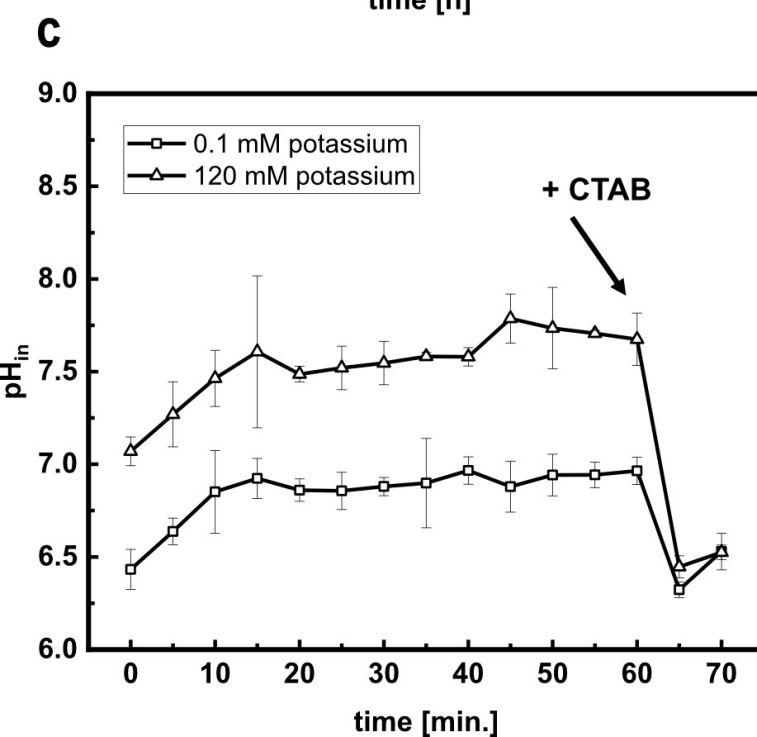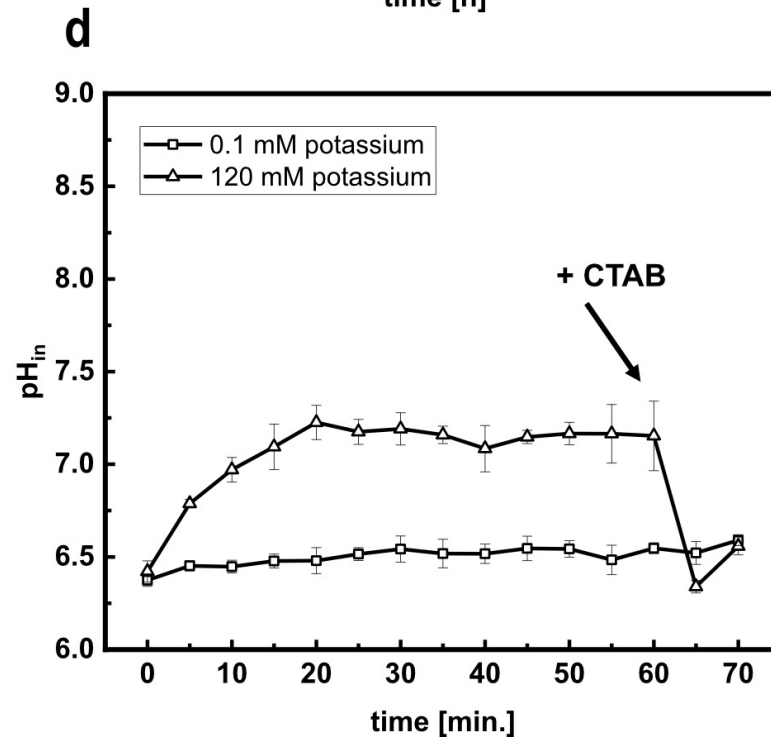

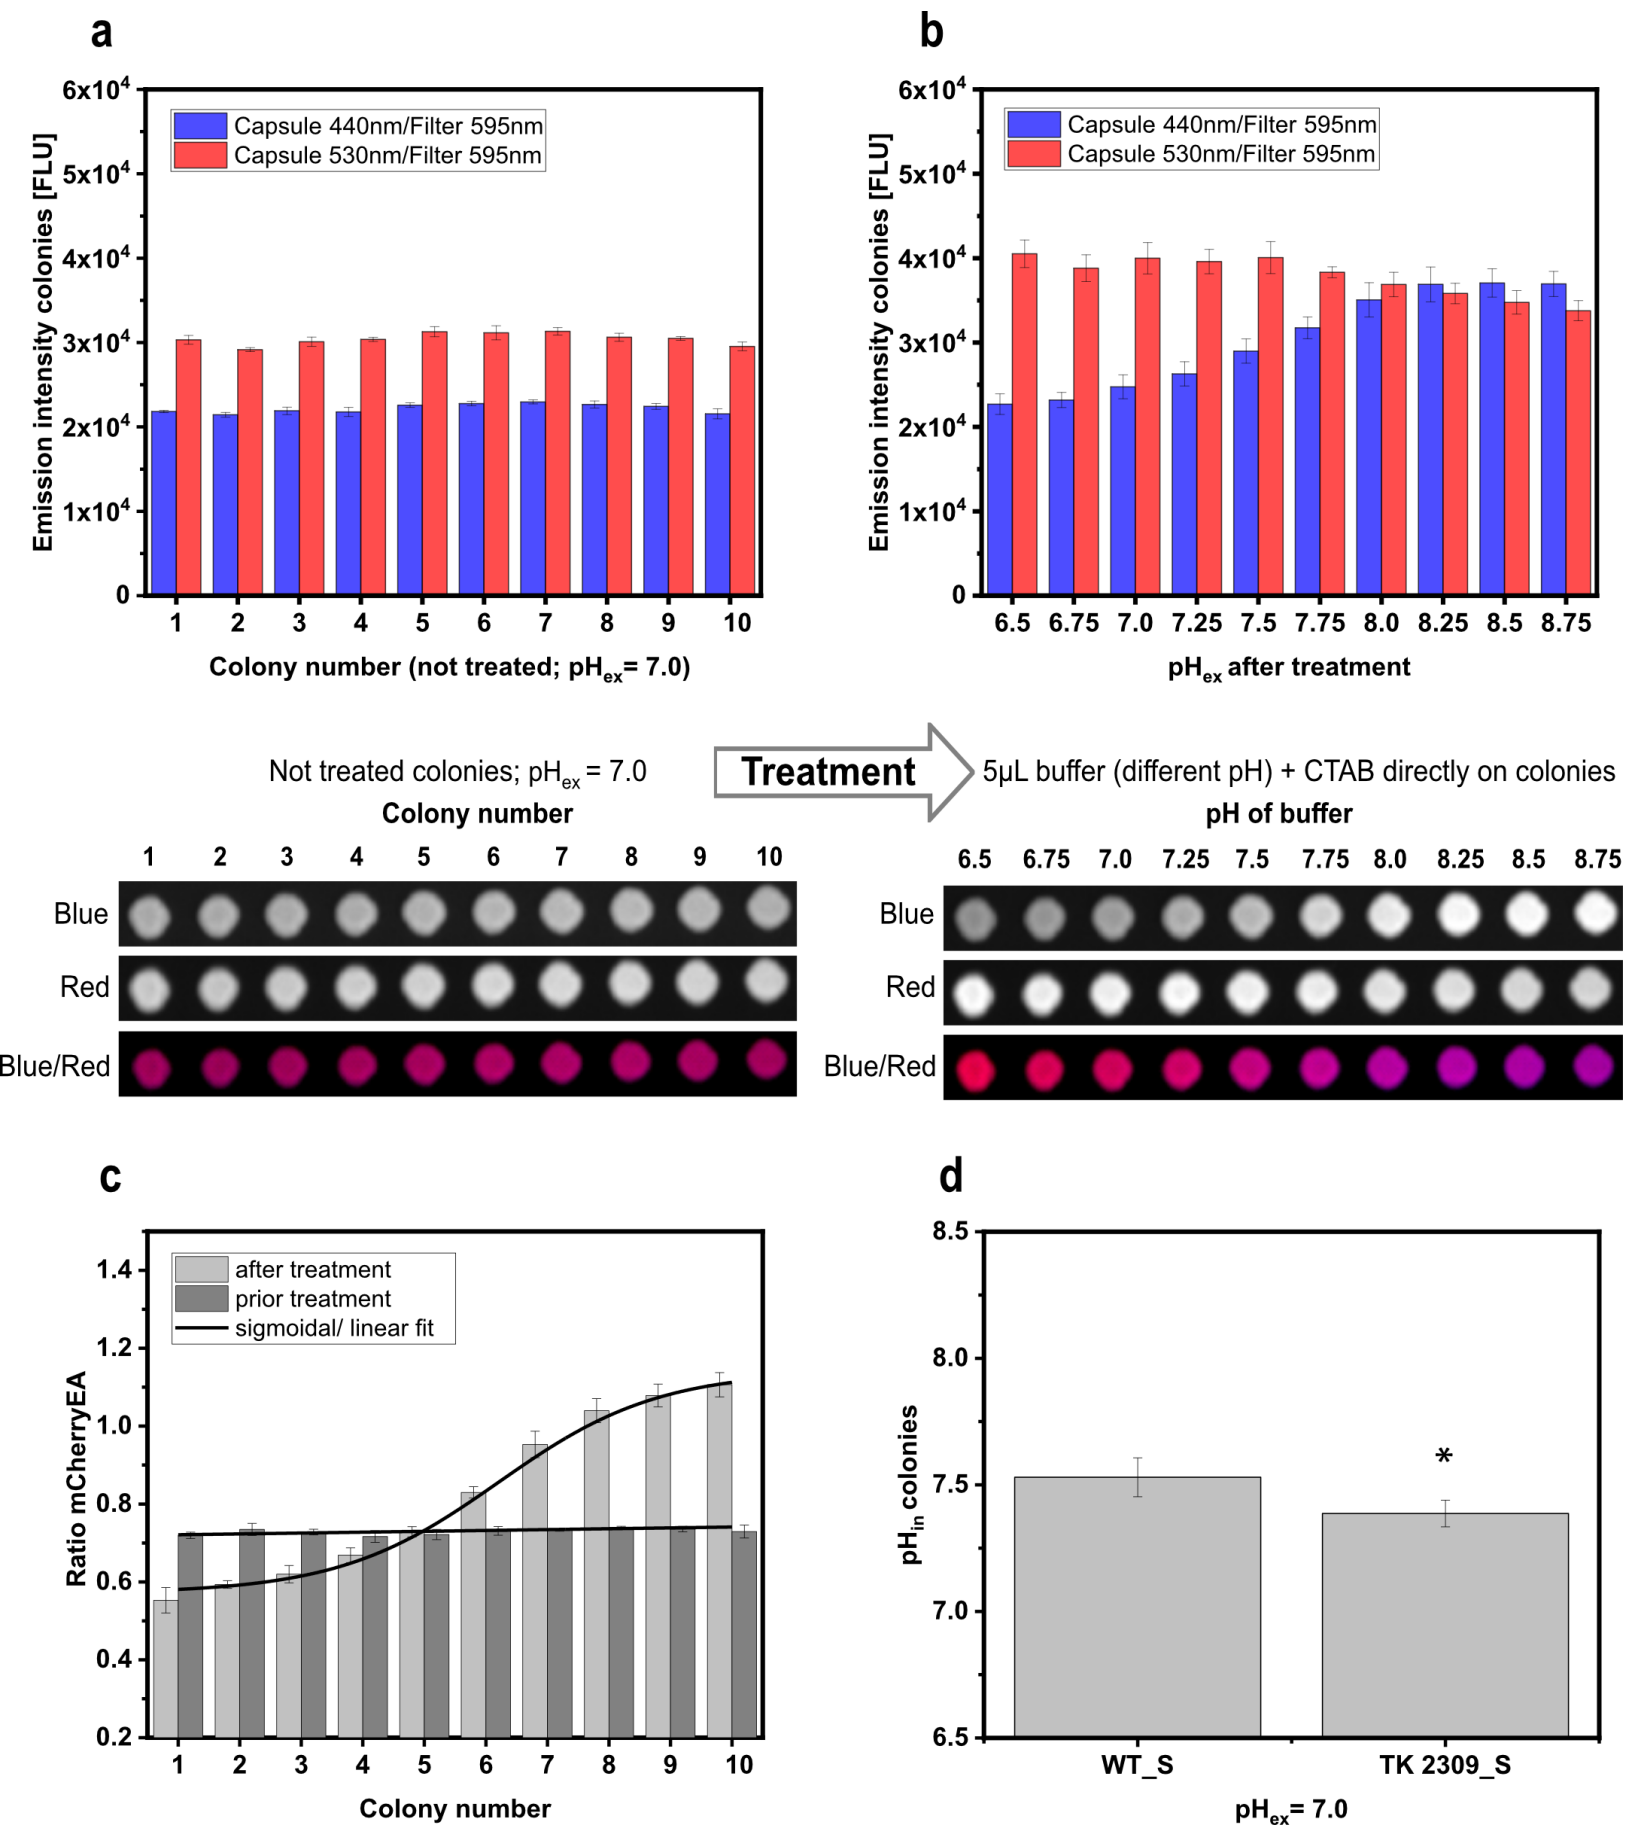

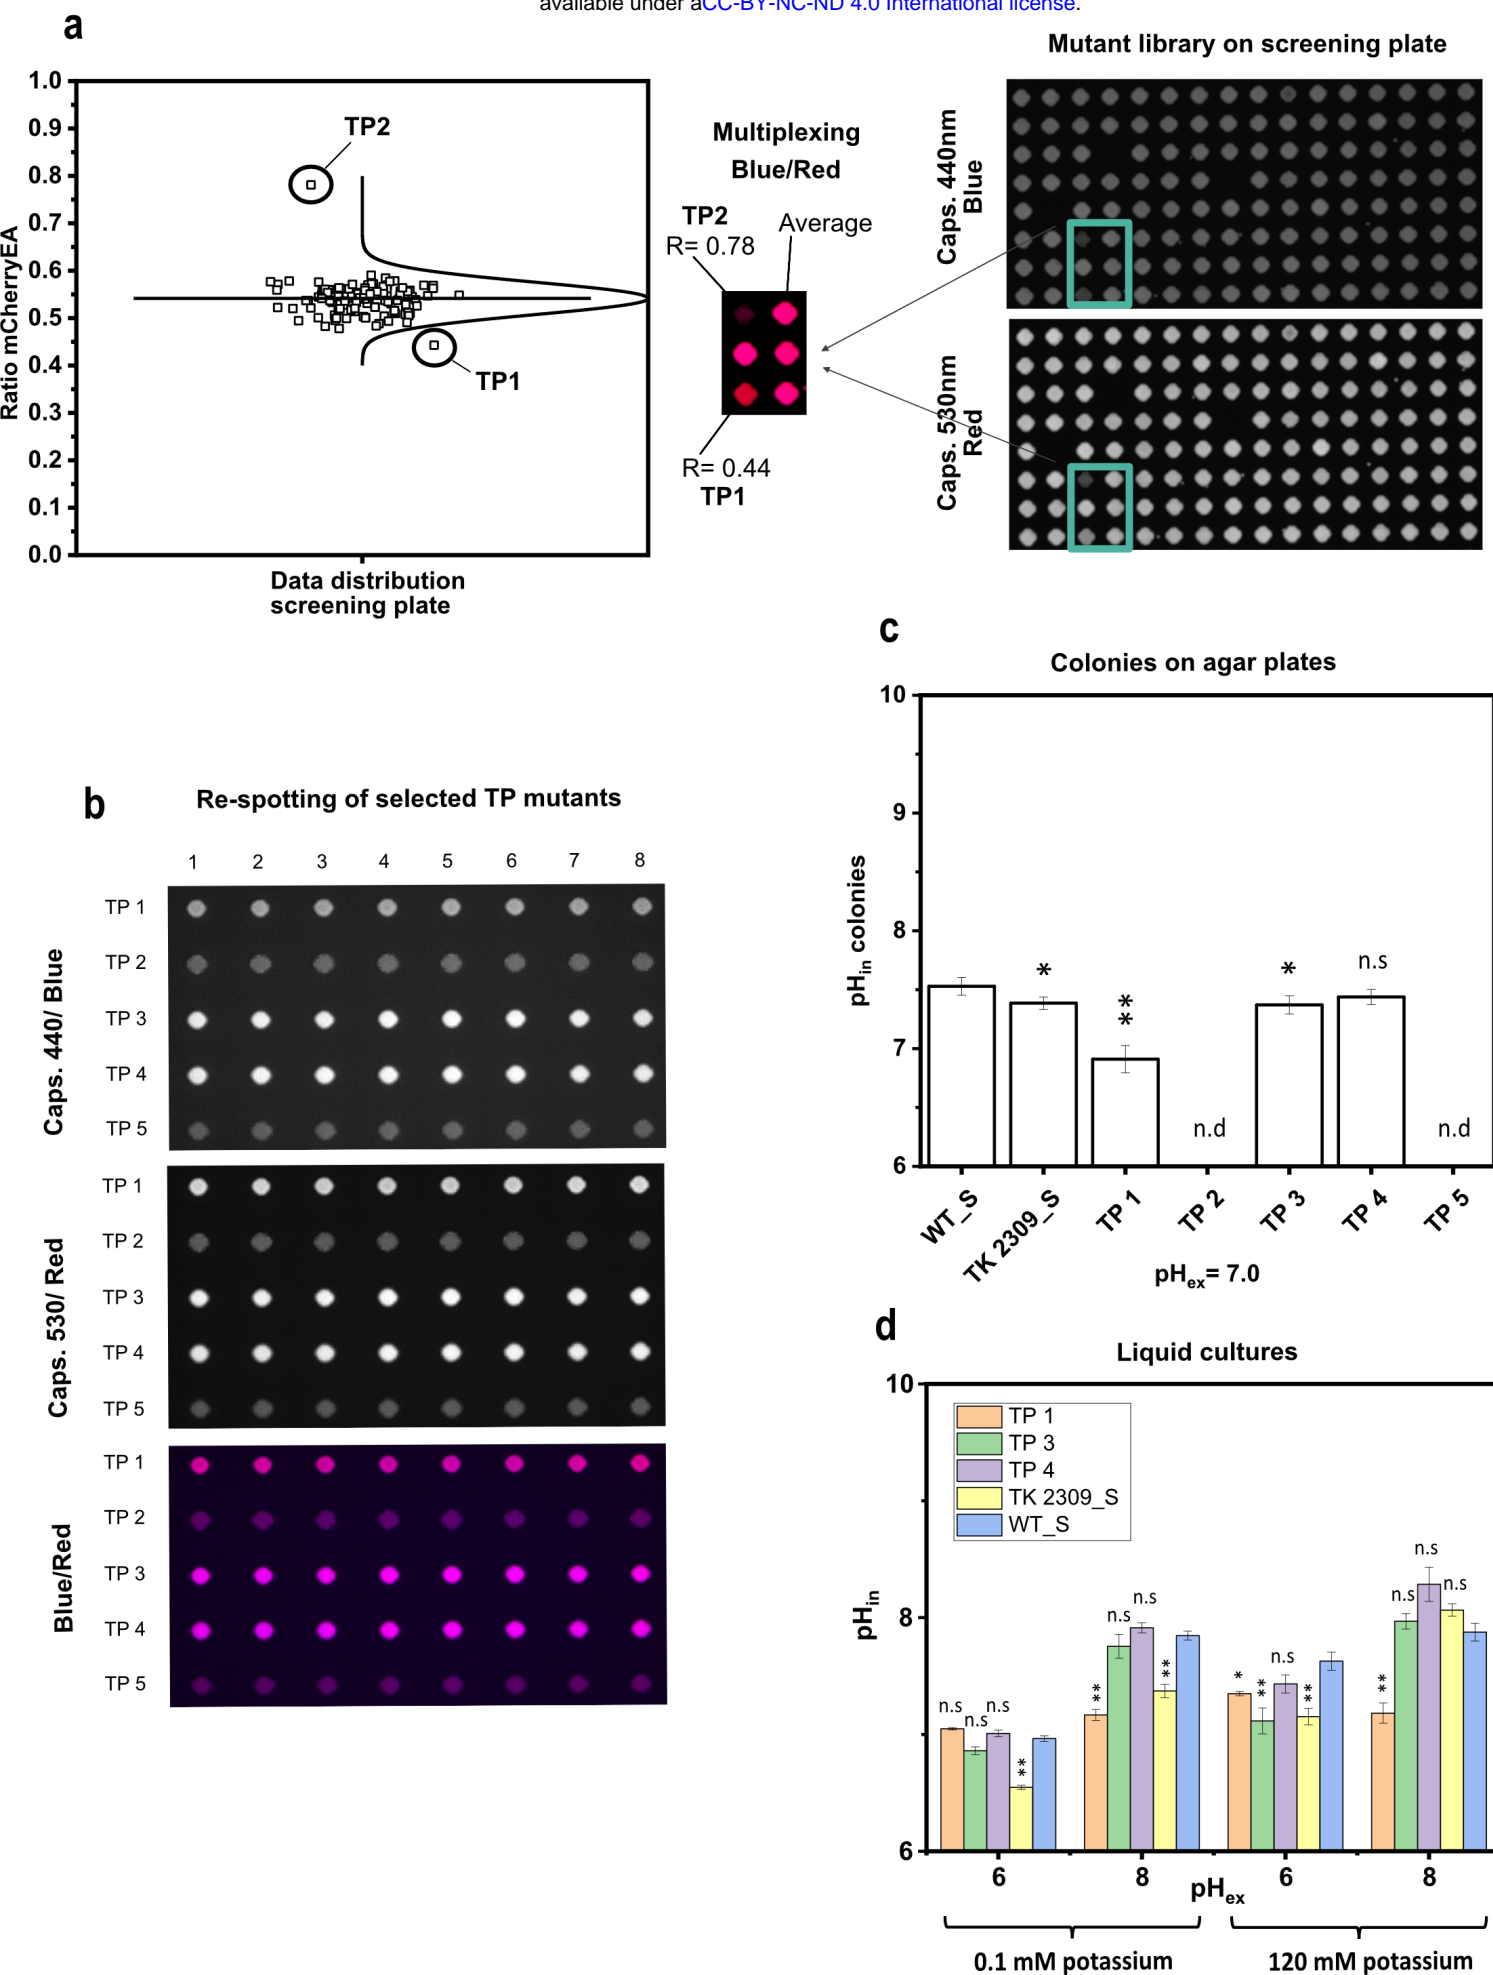

Source: https://biorxiv.org/content/10.1101/2021.07.08.451719v1.full.pdf
